# Supplementary material for: Surface plasmon-enhanced photo-driven CO2 hydrogenation by hydroxy-terminated nickel nitride nanosheets
Source: PubMed Central journal article supplement (PMC10156734; doi:10.1038/s41467-023-38235-9), 2023-05-03
Supplement: 41467_2023_38235_MOESM1_ESM.pdf [file 41467_2023_38235_MOESM1_ESM.pdf]

## Supplementary Information

### **Surface plasmon-enhanced photo-driven CO<sub>2</sub> hydrogenation by hydroxy-terminated nickel nitride nanosheets**

Saideep Singh,<sup>1#</sup> Rishi Verma,<sup>1#</sup> Nidhi Kaul,<sup>2#</sup> Jacinto Sa,<sup>2</sup> Ajinkya Punjal,<sup>3</sup> Shriganesh Prabhu,<sup>3</sup> and Vivek Polshettiwar<sup>1\*</sup>

<sup>1</sup>Department of Chemical Sciences, Tata Institute of Fundamental Research, Mumbai, India

<sup>2</sup>Department of Chemistry-Ångström Laboratory, Uppsala University, Uppsala, Sweden

<sup>3</sup>Department of Condensed Matter Physics and Materials Science, Tata Institute of Fundamental Research, Mumbai, India

\*Corresponding author. Email- [vivekpol@tifr.res.in](mailto:vivekpol@tifr.res.in) # equally contributing authors

### "Ni<sub>3</sub>N NS Synthesis Protocol"

Take nickel acetylacetonate (257 mg, 1 mmol) in 100 mL round bottom flask

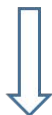

Add anhydrous o-xylene (40 mL) under argon flow using syringe

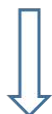

Stir for 2 min at 25 °C

Add ethylenediamine (5 mL) under argon flow using syringe

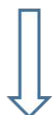

Stir for 2 min at 25 °C

Add Li<sub>3</sub>N (35 mg, 1 mmol) dispersed in 1 mL of o-xylene, under argon flow & seal with rubber septa

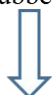

Stir for 2 h at 25 °C

Transfer in 40 mL Teflon Autoclave, seal and heat to 270 °C (ramp- 3 °C min<sup>-1</sup> )

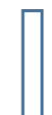

Heat for 20 h at 270 °C

Isolate the solid product by centrifugation, wash powder with EtOH (2 times) and DI water (2 times), Vacuum Dry at 45 °C

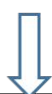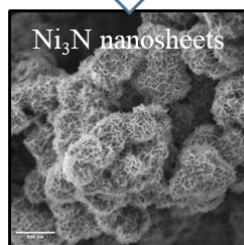

**Figure S1.** Schematic of synthesis of Ni<sub>3</sub>N nanosheets.

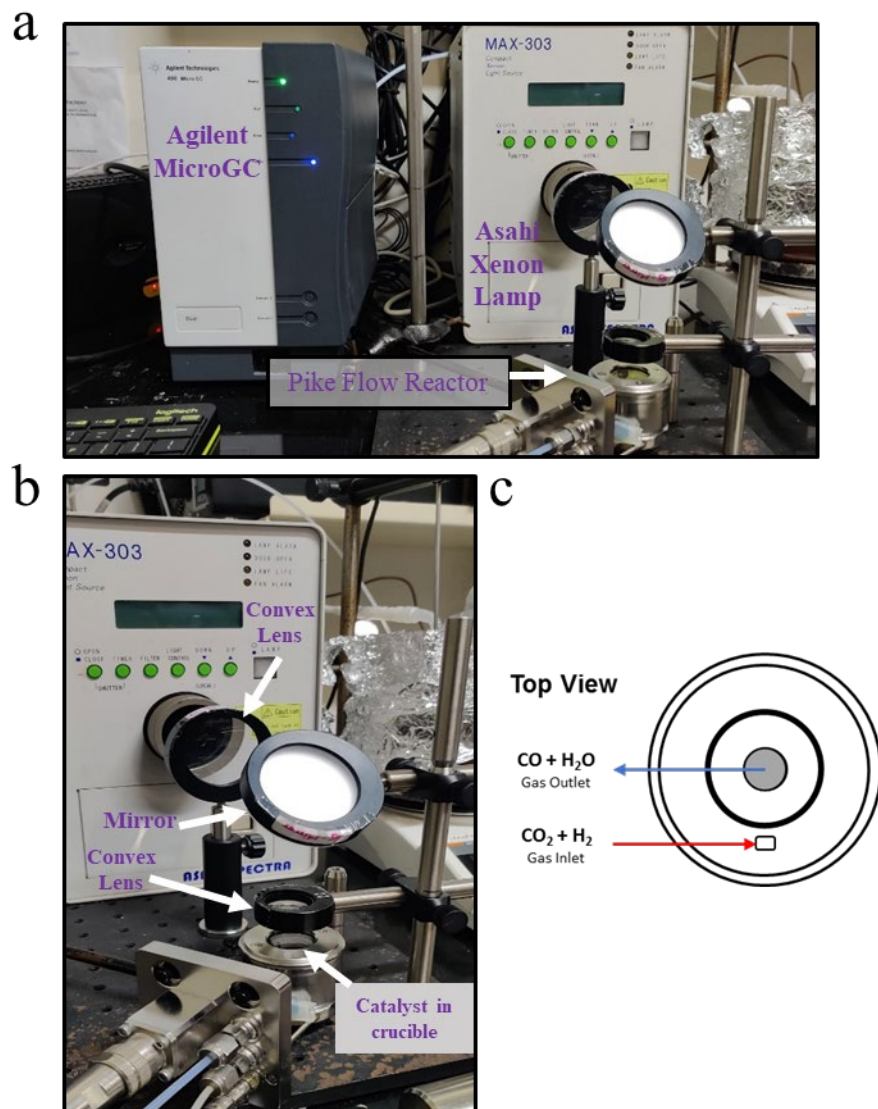

**Figure S2.** Photocatalytic CO<sub>2</sub> hydrogenation in light and dark experimental setup, (a, b) Photograph of the experimental setup, and (c) interaction of gas flow with the catalyst powder in the crucible.

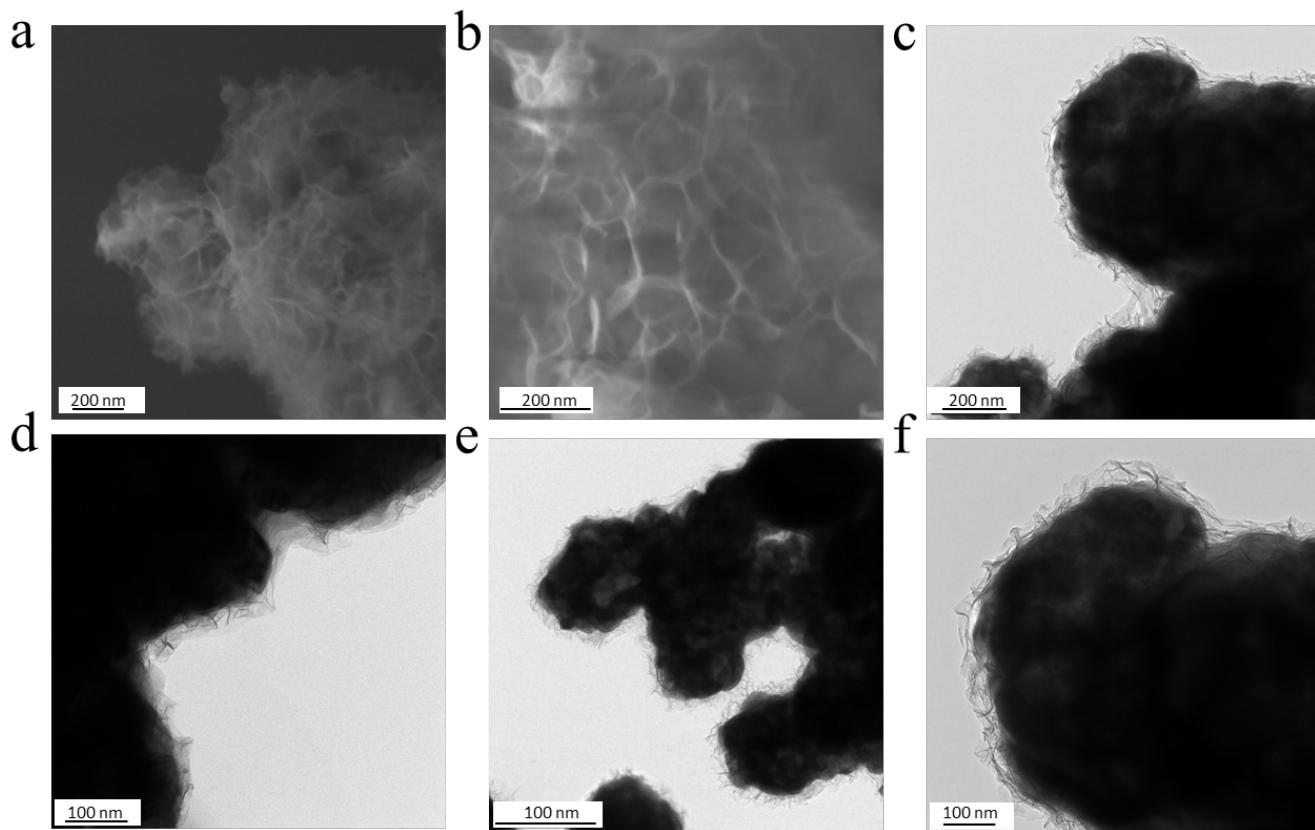

**Figure S3.** (a,b) SEM and (c-f) TEM images of Ni<sub>3</sub>N nanosheets.

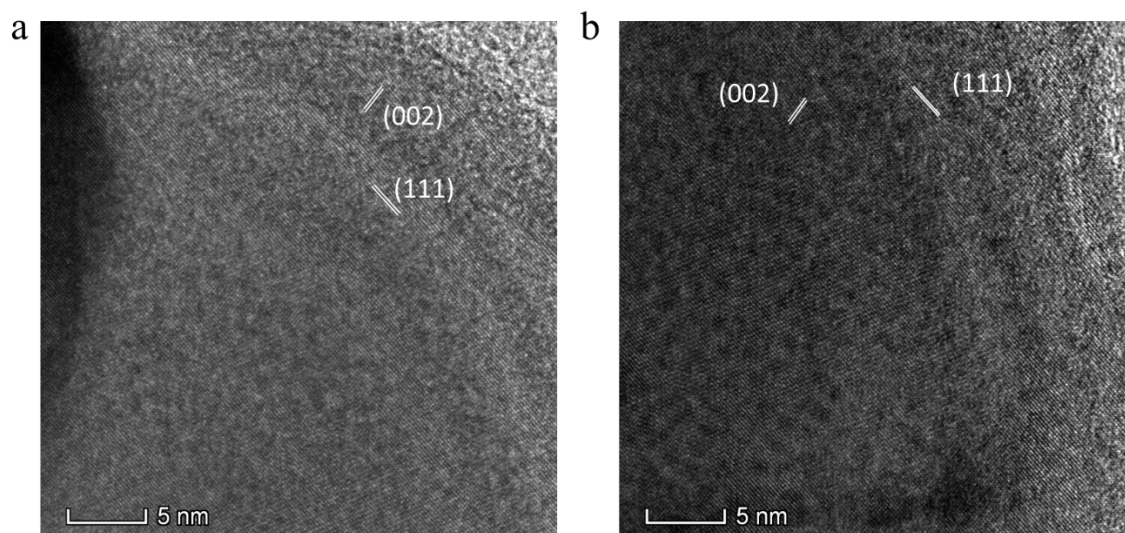

**Figure S4.** HRTEM images of Ni<sub>3</sub>N nanosheets.

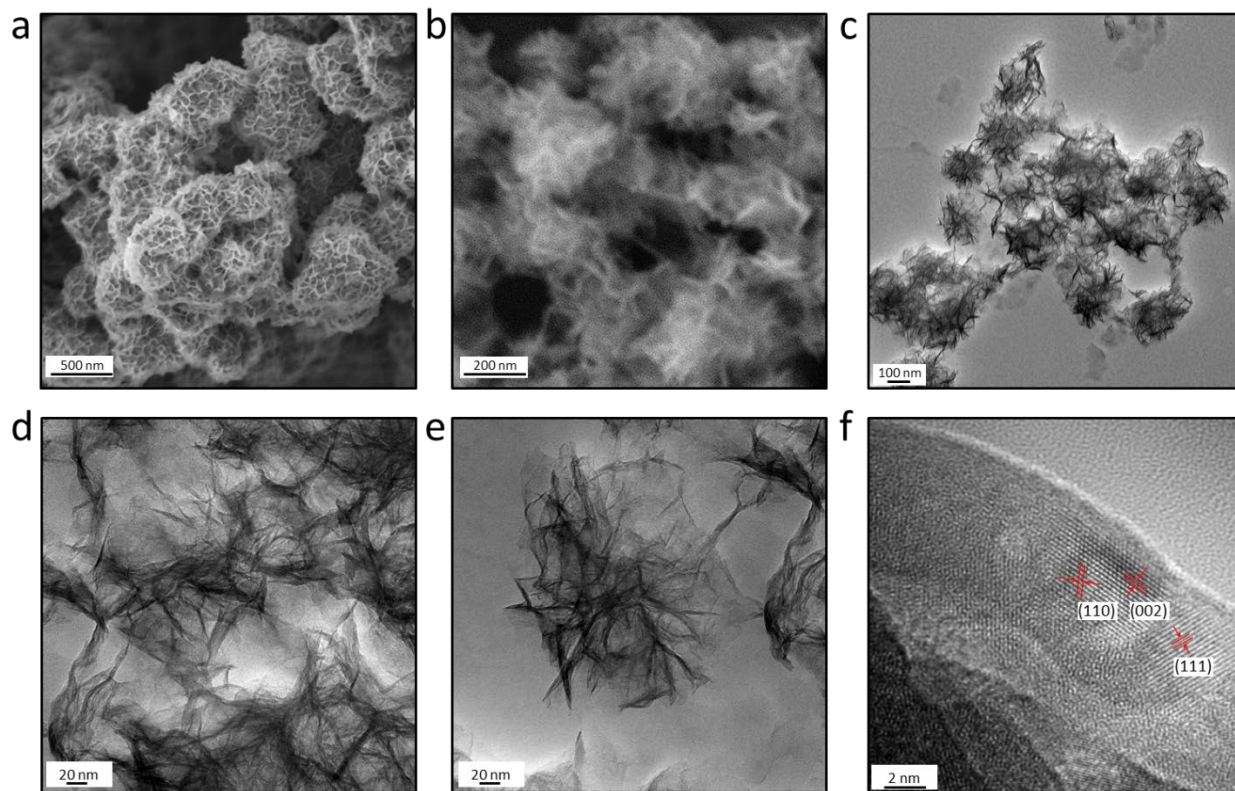

**Figure S5.** Additional (a,b) SEM images; (c-f) HRTEM images of Ni<sub>3</sub>N nanosheets.

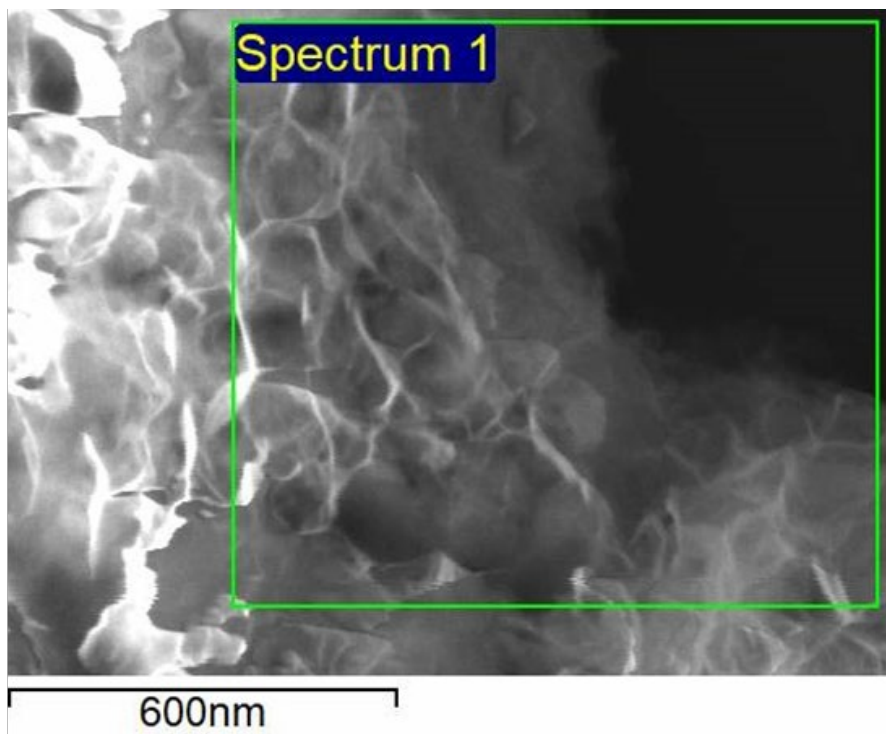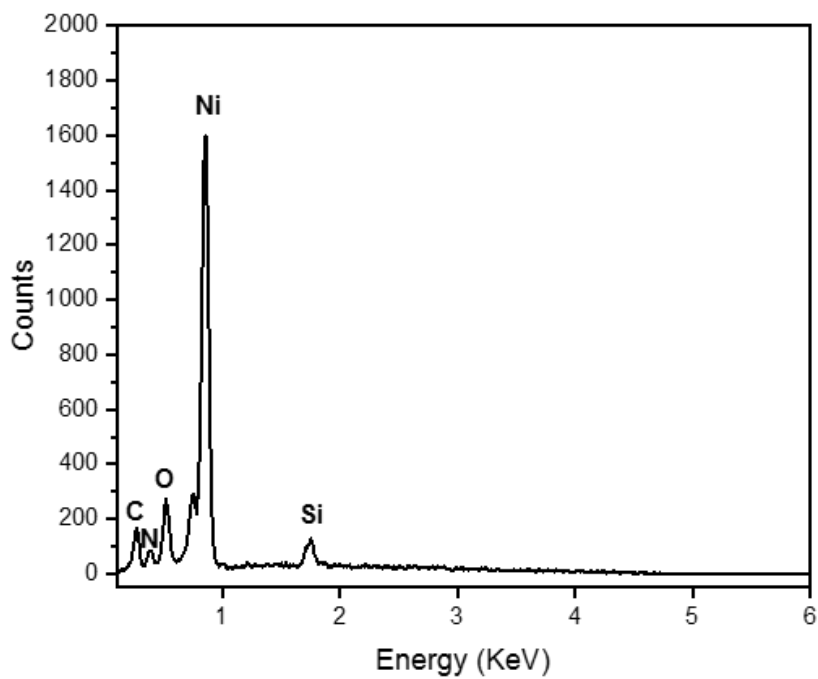

**Figure S6.** EDS spectrum of Ni<sub>3</sub>N nanosheets (bottom) and respective SEM image (top).

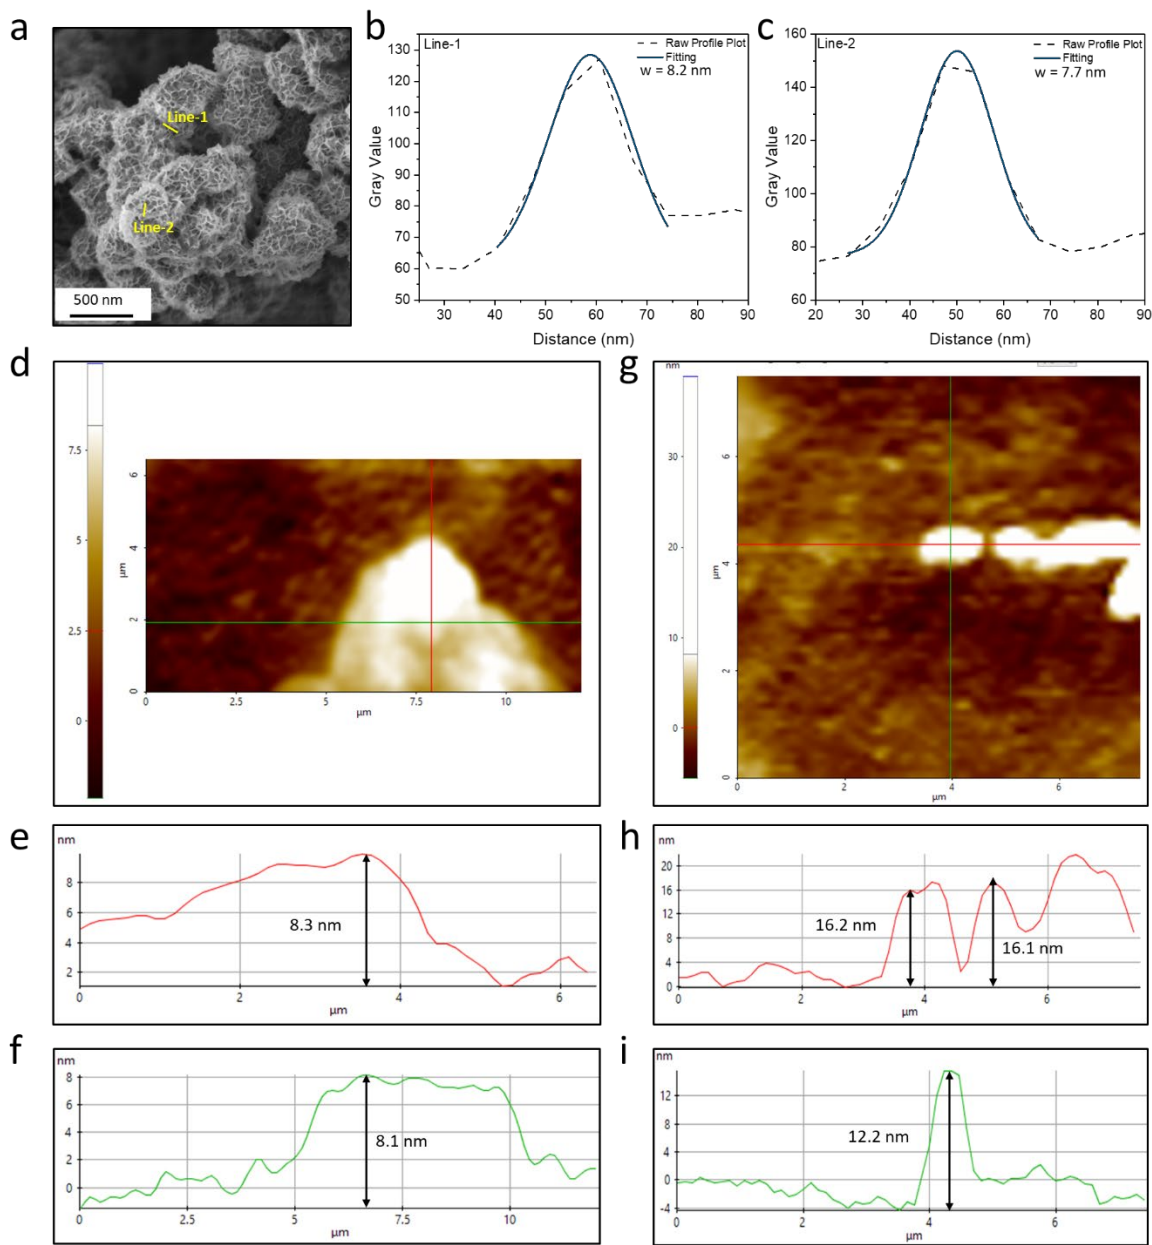

**Figure S7.** (a) SEM image and (b,c) line profile plots of line-1 and line-2 in a; (d,g) AFM images and (e,f,h,i) respective height profiles along the red and green lines. e & f for image d, and h & i for image g.

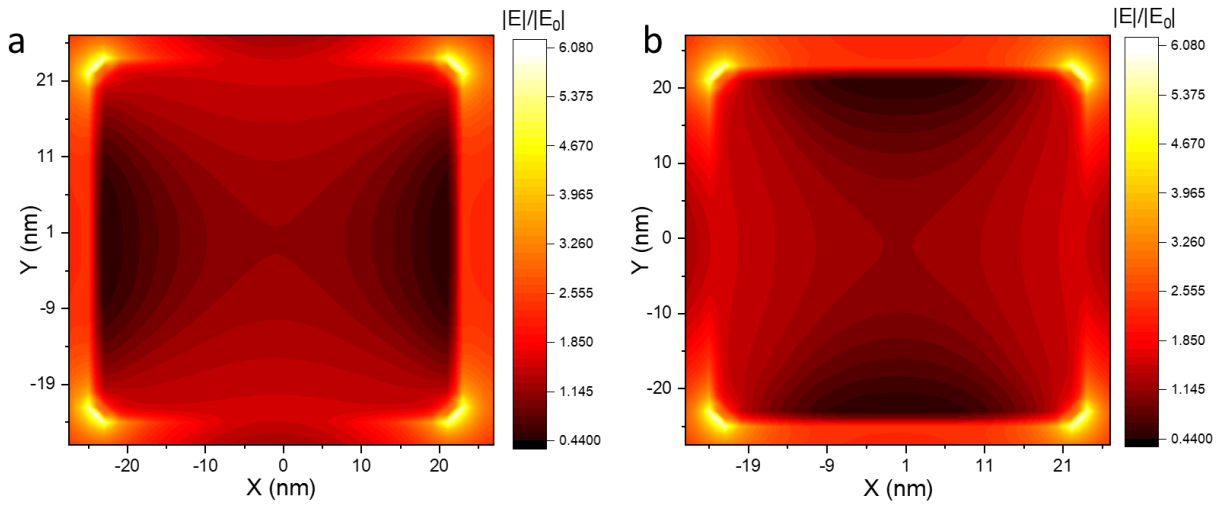

**Figure S8.** Electric field enhancement in Ni<sub>3</sub>N nanosheets by (a) y-polarized and (b) x-polarized light excitation (400-1100 nm), using finite-difference time-domain (FDTD) simulation. The dielectric constants of Ni<sub>3</sub>N was not known and hence we used the dielectric constant of ZrN (Adv. Photonics Res. 2021, 2, 2100178) to estimate the electric field in Ni<sub>3</sub>N.



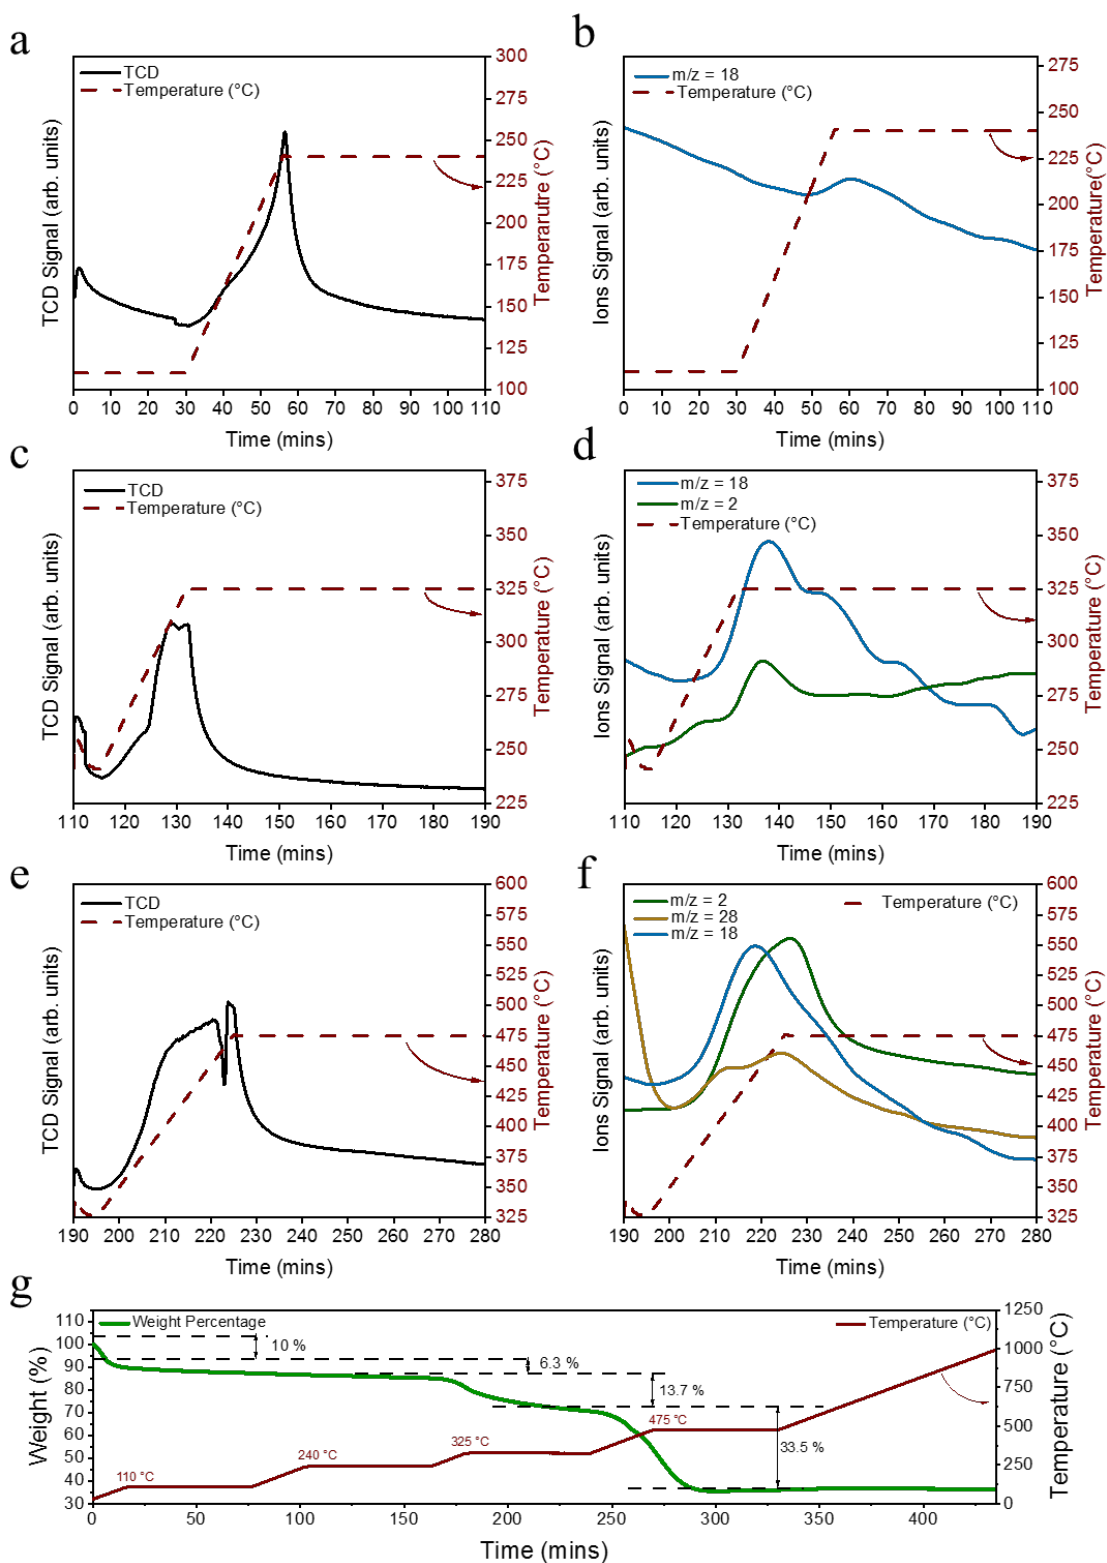

**Figure S9.** Temperature Programmed Reaction (TPReaction) of  $\text{Ni}_3\text{N}$  nanosheets. (a,c,e) TCD signal and (b,d,f) mass spectra of various products, formed at different temperature ranges, (a,b) 120 – 240  $^{\circ}\text{C}$ , (c-d) 240 – 325  $^{\circ}\text{C}$ , (e-f) 325- 475  $^{\circ}\text{C}$ ; (g) Thermogravimetric analysis (TGA) of  $\text{Ni}_3\text{N}$  nanosheets.

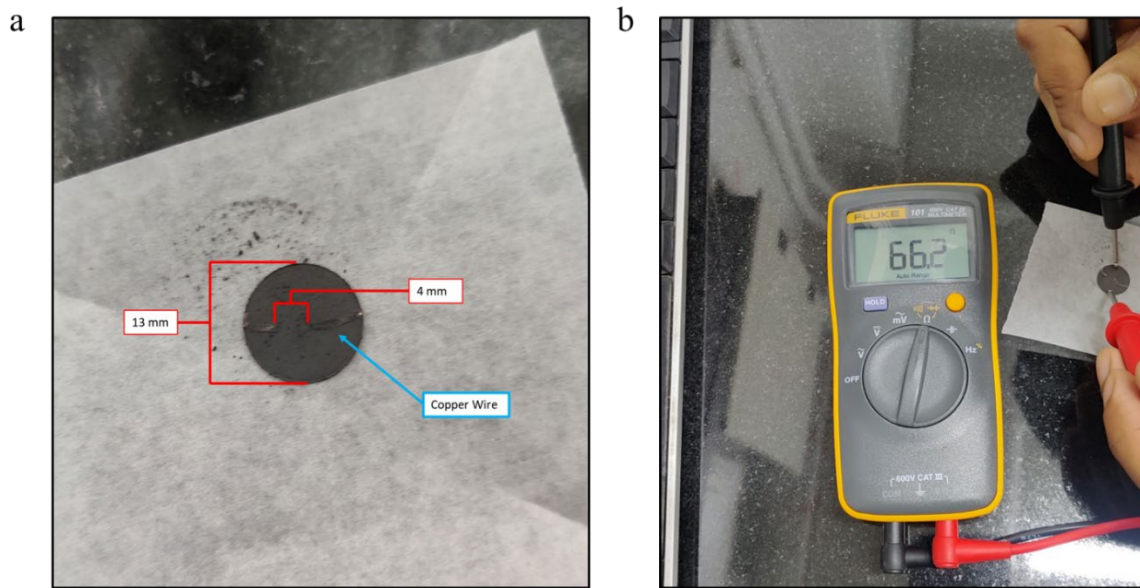

**Figure S10.** Measurement of electrical resistivity of Ni<sub>3</sub>N nanosheet. (a) Ni<sub>3</sub>N pellet, (b) resistivity measurement by fluke multimeter.

**Calculations:**

$$\begin{aligned}
 \text{Resistivity Formula:} &= \frac{\text{Resistance}(\text{ohm}) \times \text{Area}(\text{m}^2)}{\text{length}(\text{m})} \\
 &= \frac{66.2 \times 3.14 \times (0.1 \times 10^{-3})^2}{(13 \times 10^{-3})} \\
 &= \frac{207.8 \times 10^{-8}}{13 \times 10^{-3}} \\
 &= 16.0 \times 10^{-5} \text{ ohm m}
 \end{aligned}$$

$$\begin{aligned}
 \text{Conductivity} &= \frac{1}{\text{Resistivity}} \\
 &= \frac{1}{16.0 \times 10^{-5} \text{ ohm m}} = 6.25 \times 10^3 \text{ S m}^{-1}
 \end{aligned}$$

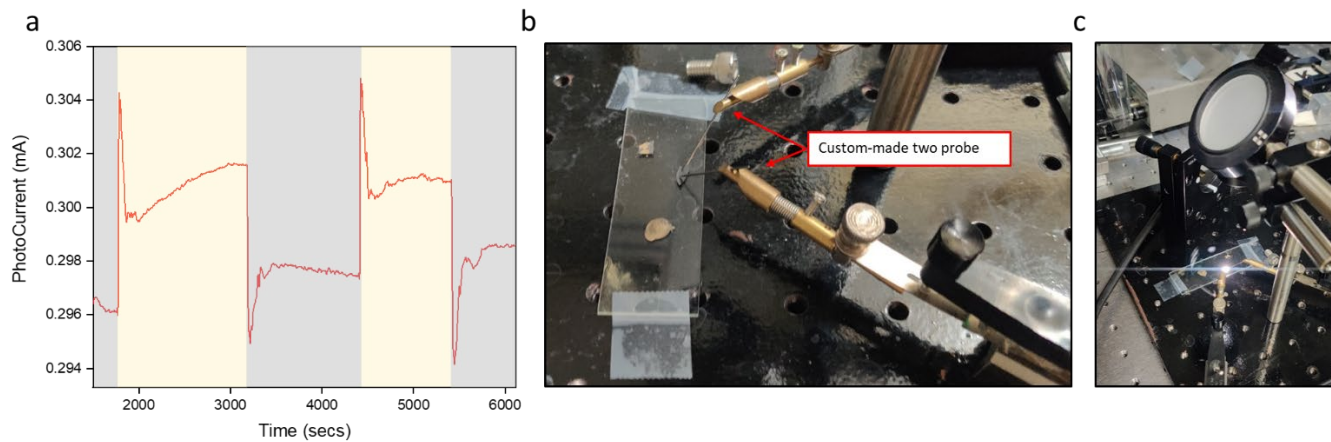

**Figure S11.** (a) Photocurrent measurement of a Ni<sub>3</sub>N nanosheet in a light on-off cycle using a xenon lamp (400- 1100 nm) under an external bias of 100 mV, (b,c) experimental setup for photocurrent measurement.

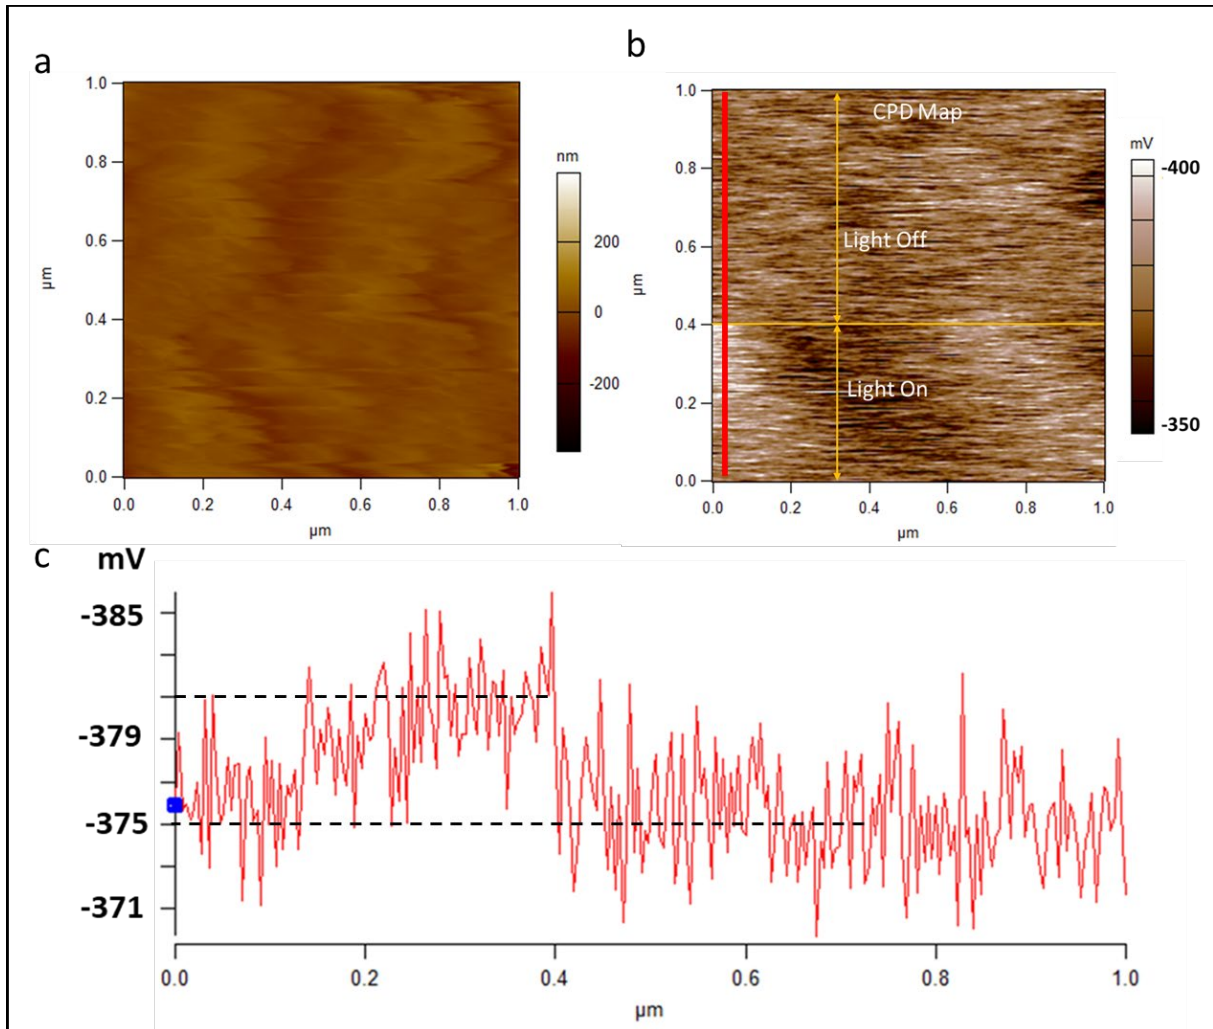

**Figure S12.** (a) AFM height profile image, (b) KPFM potential image of the Ni<sub>3</sub>N nanosheets, (c) Line map (shown in red) of potential from image (b).

*The calculated work function of Ti/Ir tip is 4.96 eV*

$$\text{Work Function in dark } (WF_{\text{dark}}): \varphi_D = (4.96 - 0.375) \text{ eV} = 4.585 \text{ eV}$$

$$\text{Work Function in light } (WF_{\text{light}}): \varphi_L = (4.96 - 0.381) \text{ eV} = 4.579 \text{ eV}$$

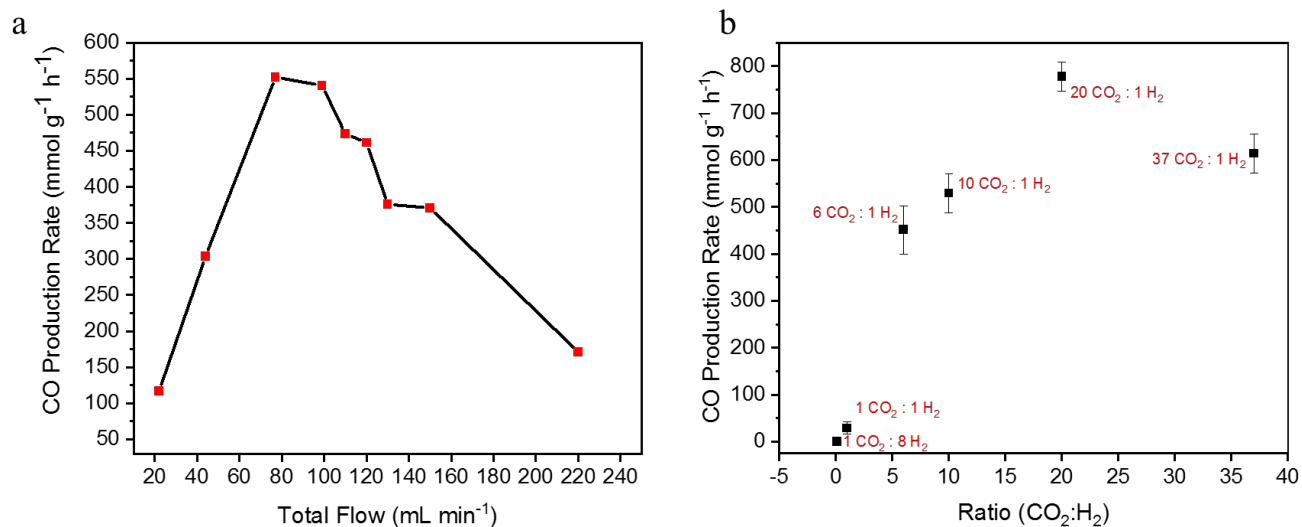

**Figure S13.** Photocatalytic CO production rate by Ni<sub>3</sub>N nanosheets as a function of (a) total flow and (b) ratio of CO<sub>2</sub>:H<sub>2</sub> at a total flow of 77 mL min<sup>-1</sup>. Error bars: Calculated from data of at least three repeated experiments.

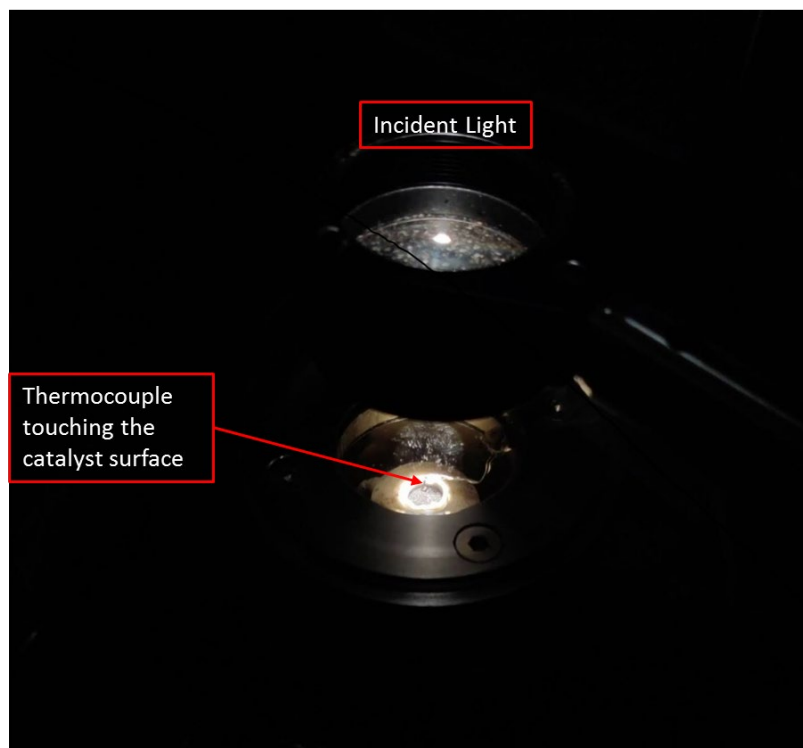

**Figure S14.** Setup for measuring the catalyst bed temperature using thermocouple touching the catalyst surface, irradiated with 400-1100 nm light using xenon lamp at 2.5 W cm<sup>-2</sup>.

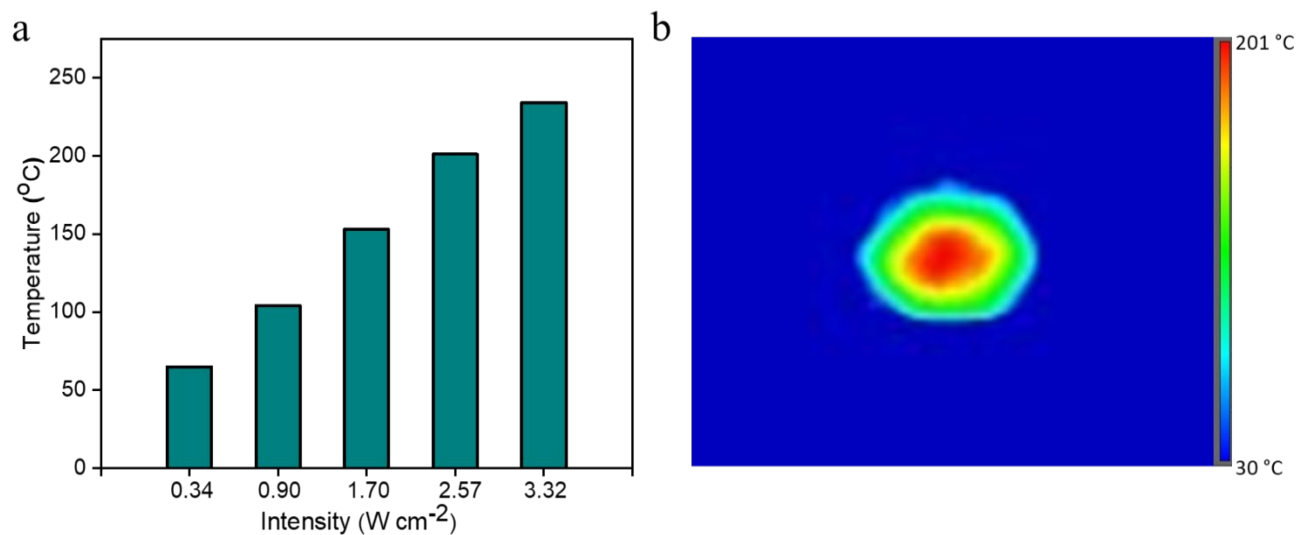

**Figure S15.** (a) Temperature as a function of the intensity measured by IR thermal imaging camera (FLIR A6700sc), (b) temperature profile of the sample having 1 cm diameter irradiated with 400-1100 nm light using xenon lamp at  $2.5\ W\ cm^{-2}$ .

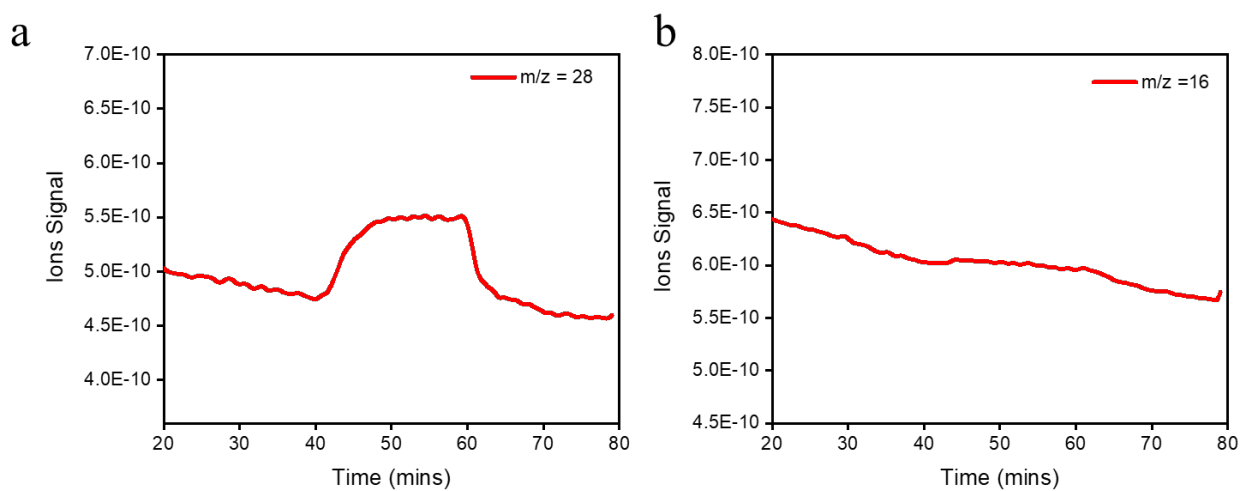

**Figure S16.** Ion counts of products of photocatalytic CO<sub>2</sub> hydrogenation in a mass spectrometer (MS), (a) CO, (b) CH<sub>4</sub>.

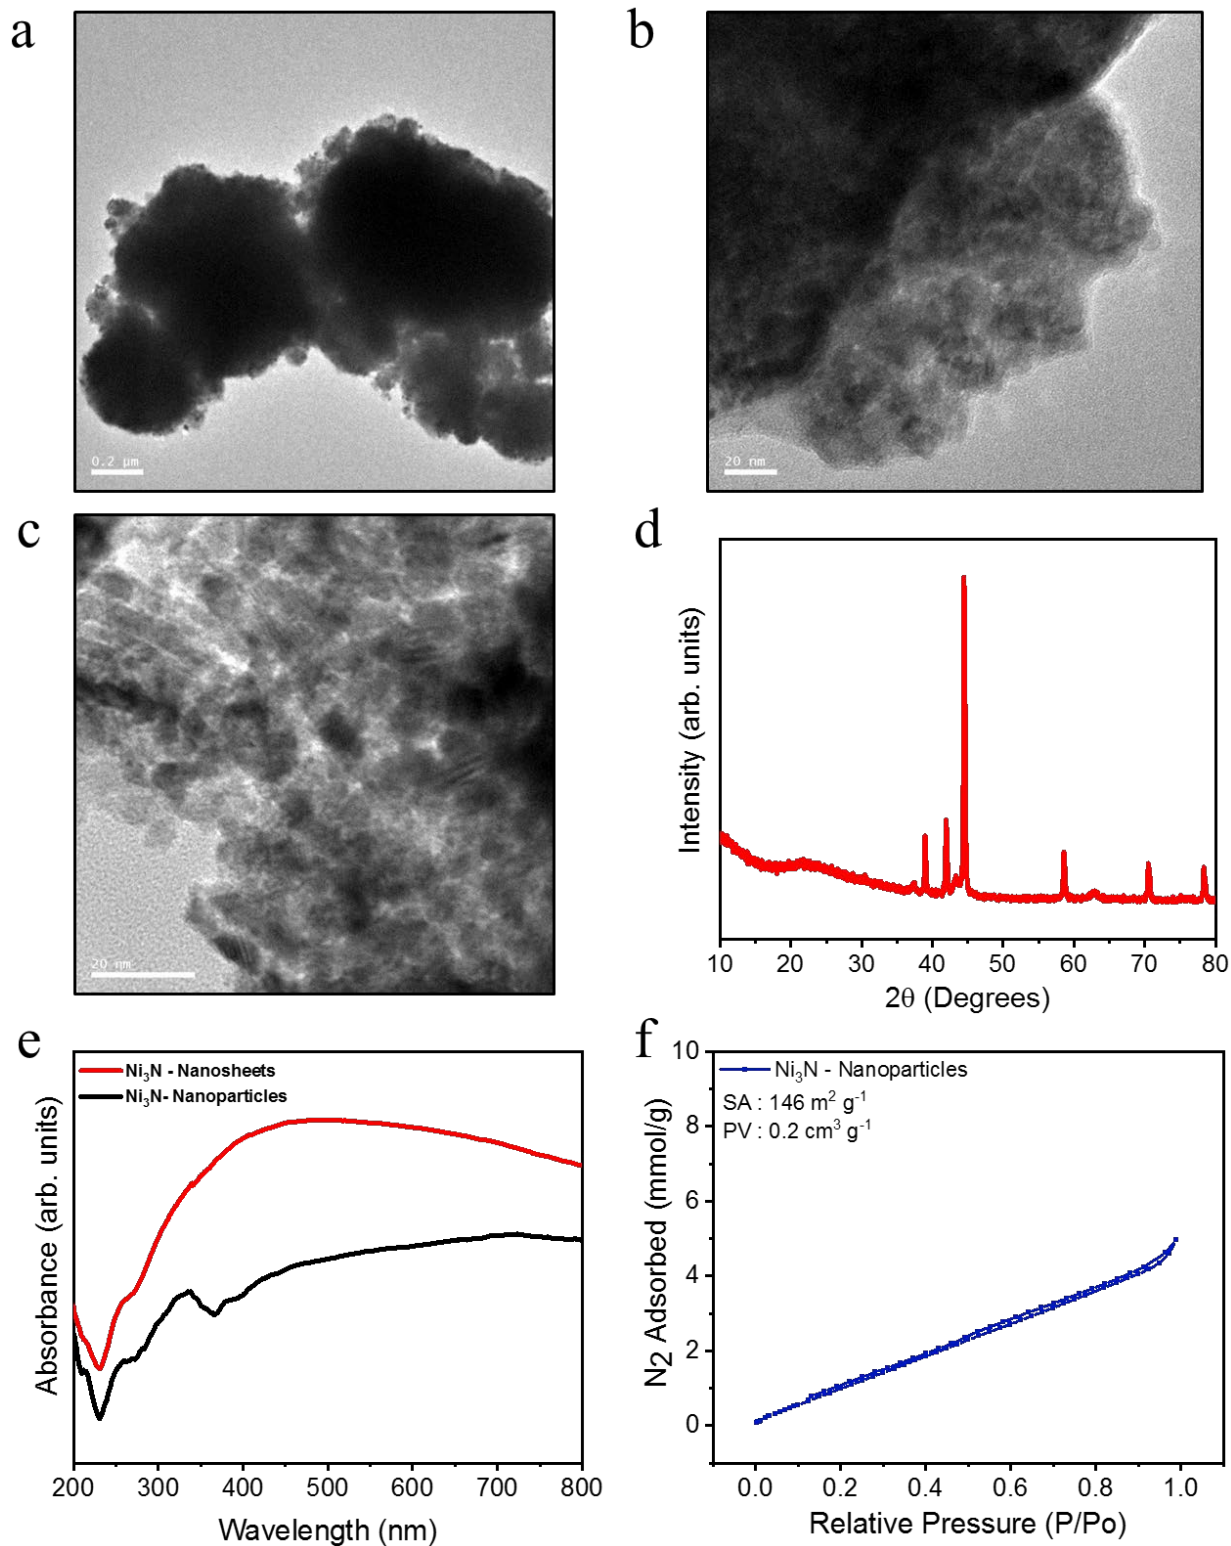

**Figure S17.** Characterization of Ni<sub>3</sub>N nanoparticles, (a-c) TEM images of Ni<sub>3</sub>N nanoparticles, (d) PXRD pattern, (e) absorption spectra of Ni<sub>3</sub>N nanosheets and Ni<sub>3</sub>N nanoparticle, (f) N<sub>2</sub> sorption isotherm of Ni<sub>3</sub>N nanoparticles.

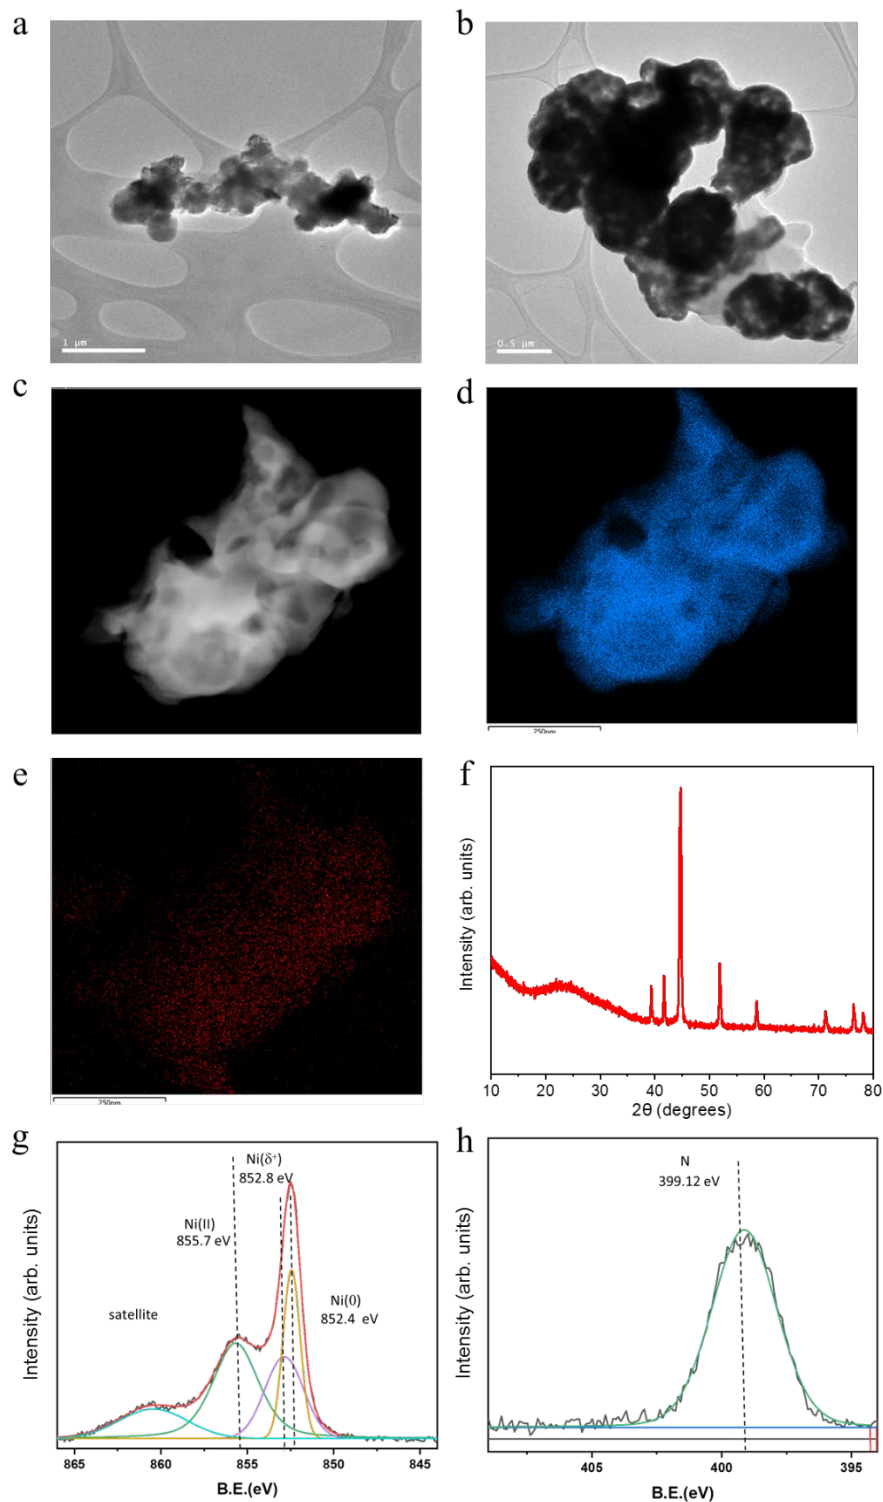

**Figure S18.** Characterization of  $\text{Ni}_3\text{N}$  nanosheets after photocatalytic  $\text{CO}_2$  hydrogenation, (a,b) TEM images, (c) Dark field image of  $\text{Ni}_3\text{N}$  nanosheets and corresponding EDS mapping (d) Ni and (e) N, (f) PXRD pattern, XPS spectra expanded in the region of (g) Ni  $2p_{3/2}$ , and (h) N  $1s$ .



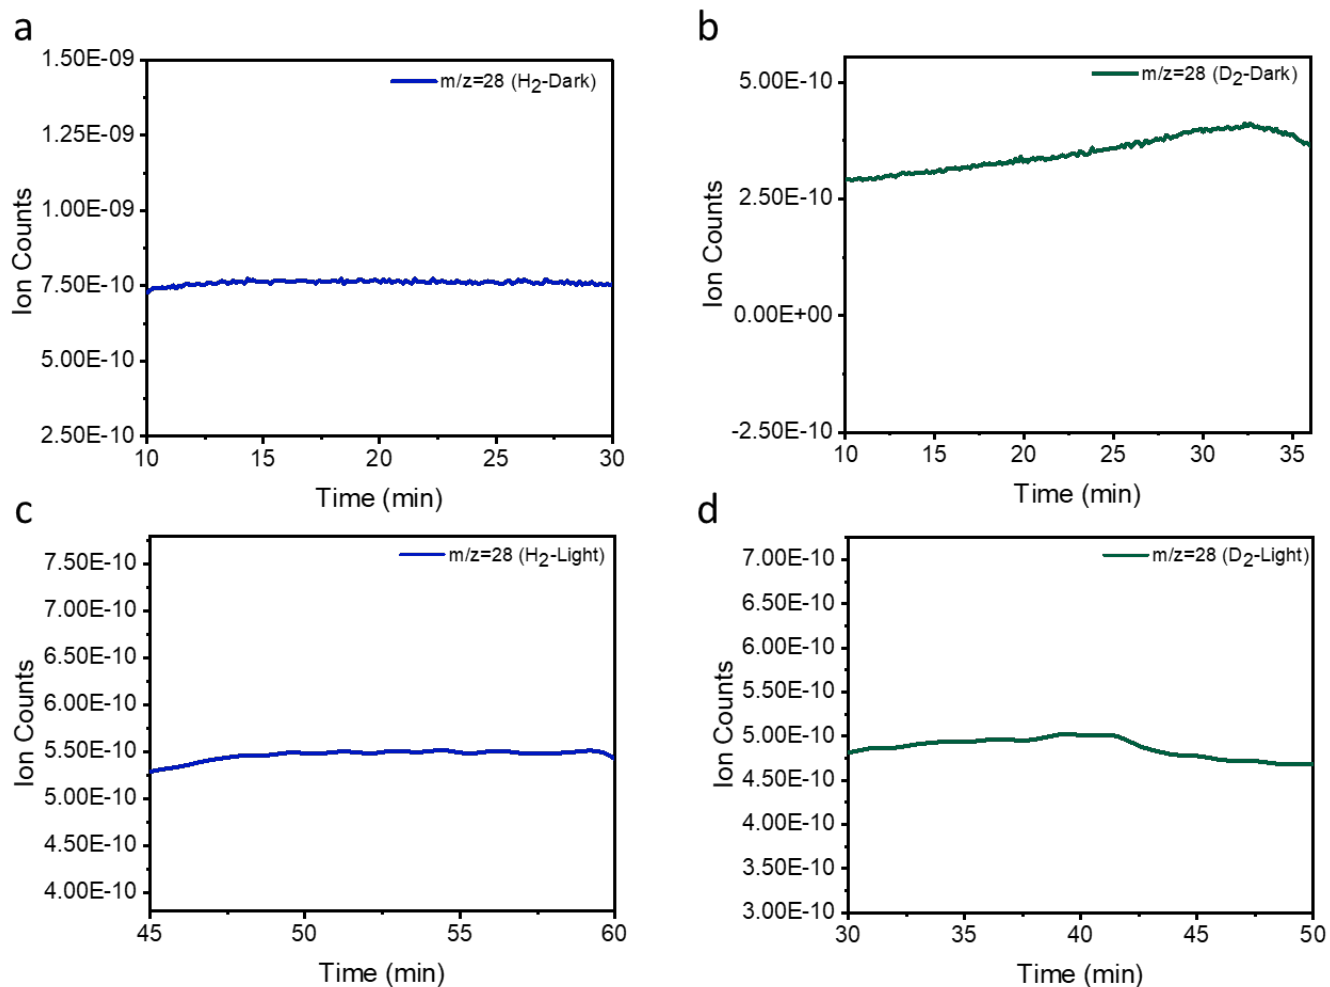

**Figure S19.** Ions signal of CO during Ni<sub>3</sub>N nanosheets catalyzed reaction of (a) CO<sub>2</sub> + H<sub>2</sub>, (b) CO<sub>2</sub> + D<sub>2</sub> in dark and (c) CO<sub>2</sub> + H<sub>2</sub>, (d) CO<sub>2</sub> + D<sub>2</sub> in light.

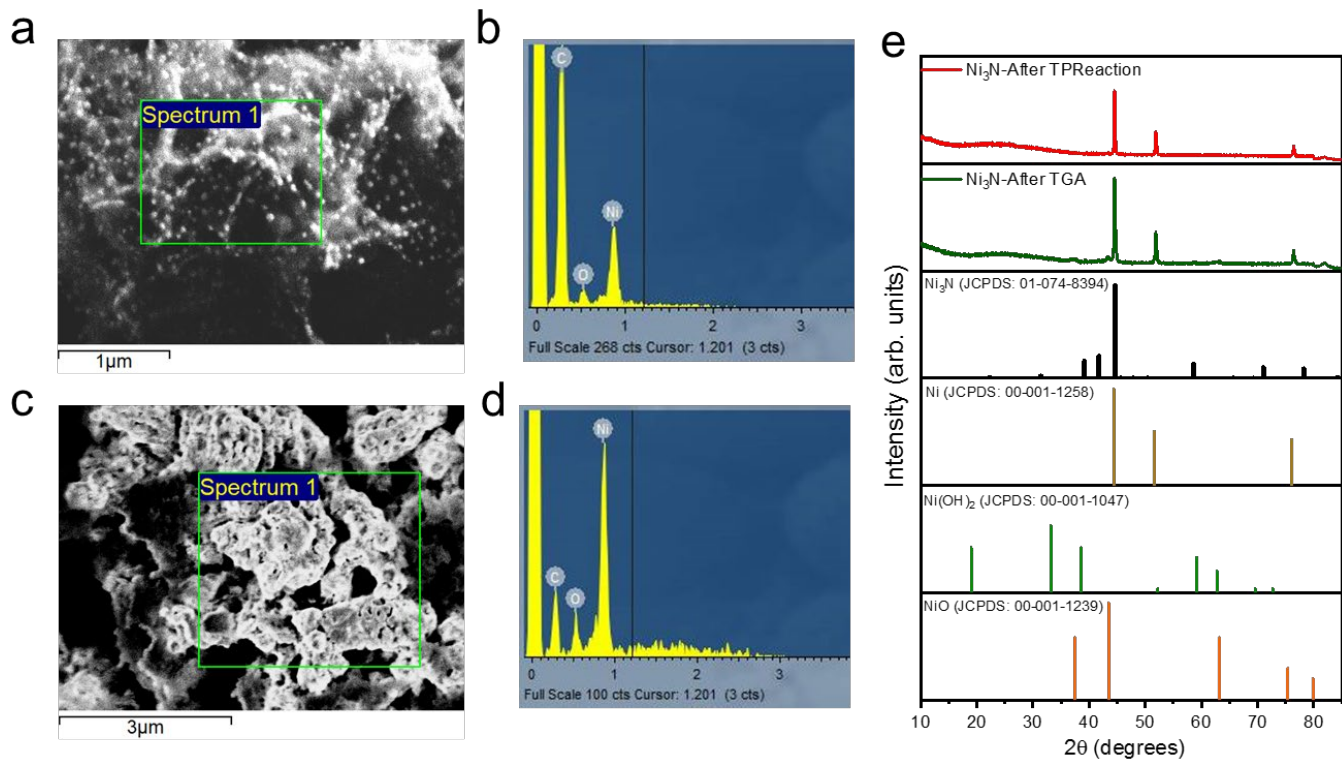

**Figure S20.** Characterization of  $\text{Ni}_3\text{N}$  nanosheets, (a) SEM, (b) EDS spectrum after TPReaction, and (c) SEM, (d) EDS spectrum after TGA; (e) PXRD of  $\text{Ni}_3\text{N}$  after TPReaction and TGA.

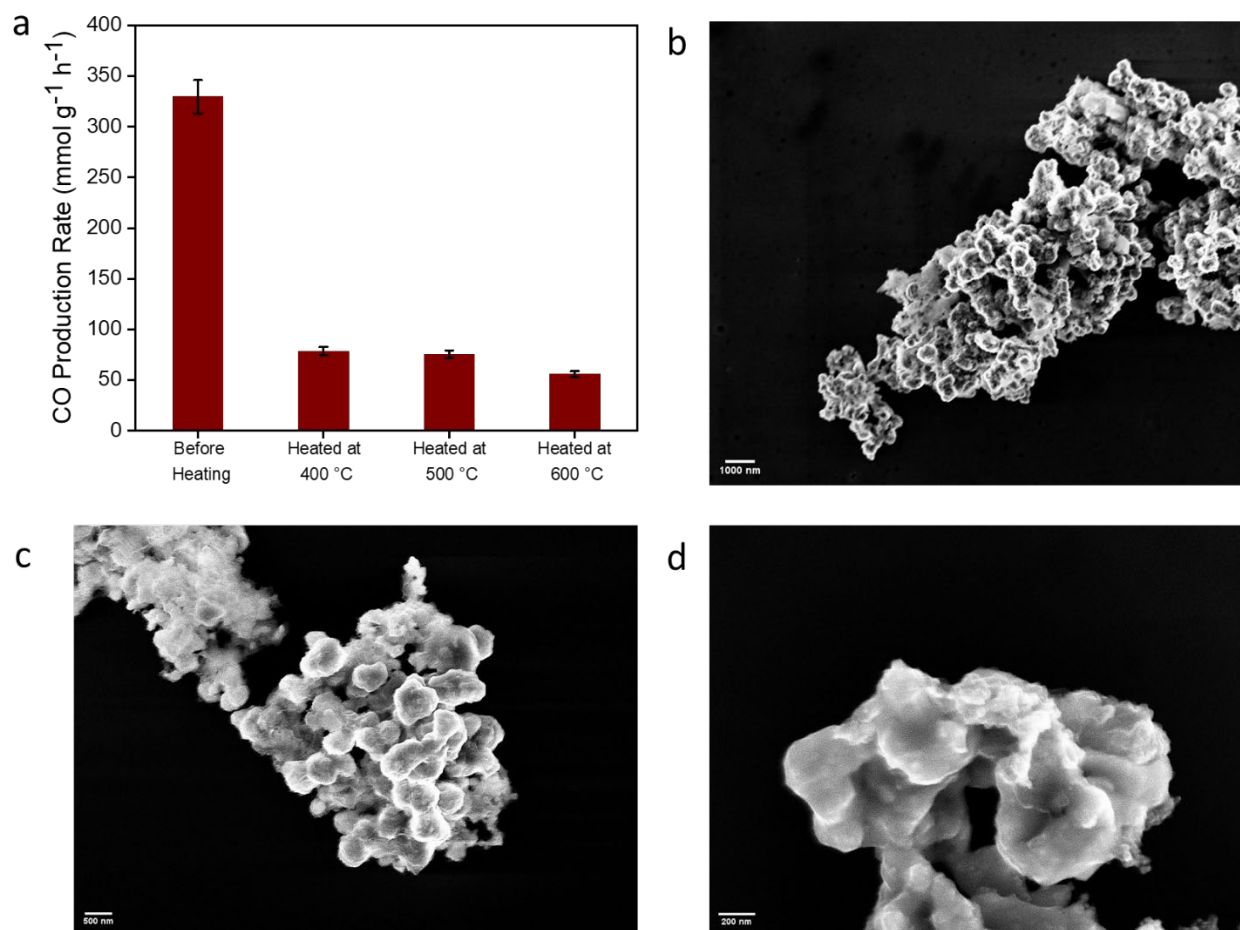

**Figure S21.** (a) Photocatalytic CO<sub>2</sub> hydrogenation by Ni<sub>3</sub>N nanosheets after treating it at different temperatures. SEM images of Ni<sub>3</sub>N nanosheets heated at (b) 400 °C, (c) 500 °C, and (d) 600 °C. Error bars: Calculated from data of at least three repeated experiments.

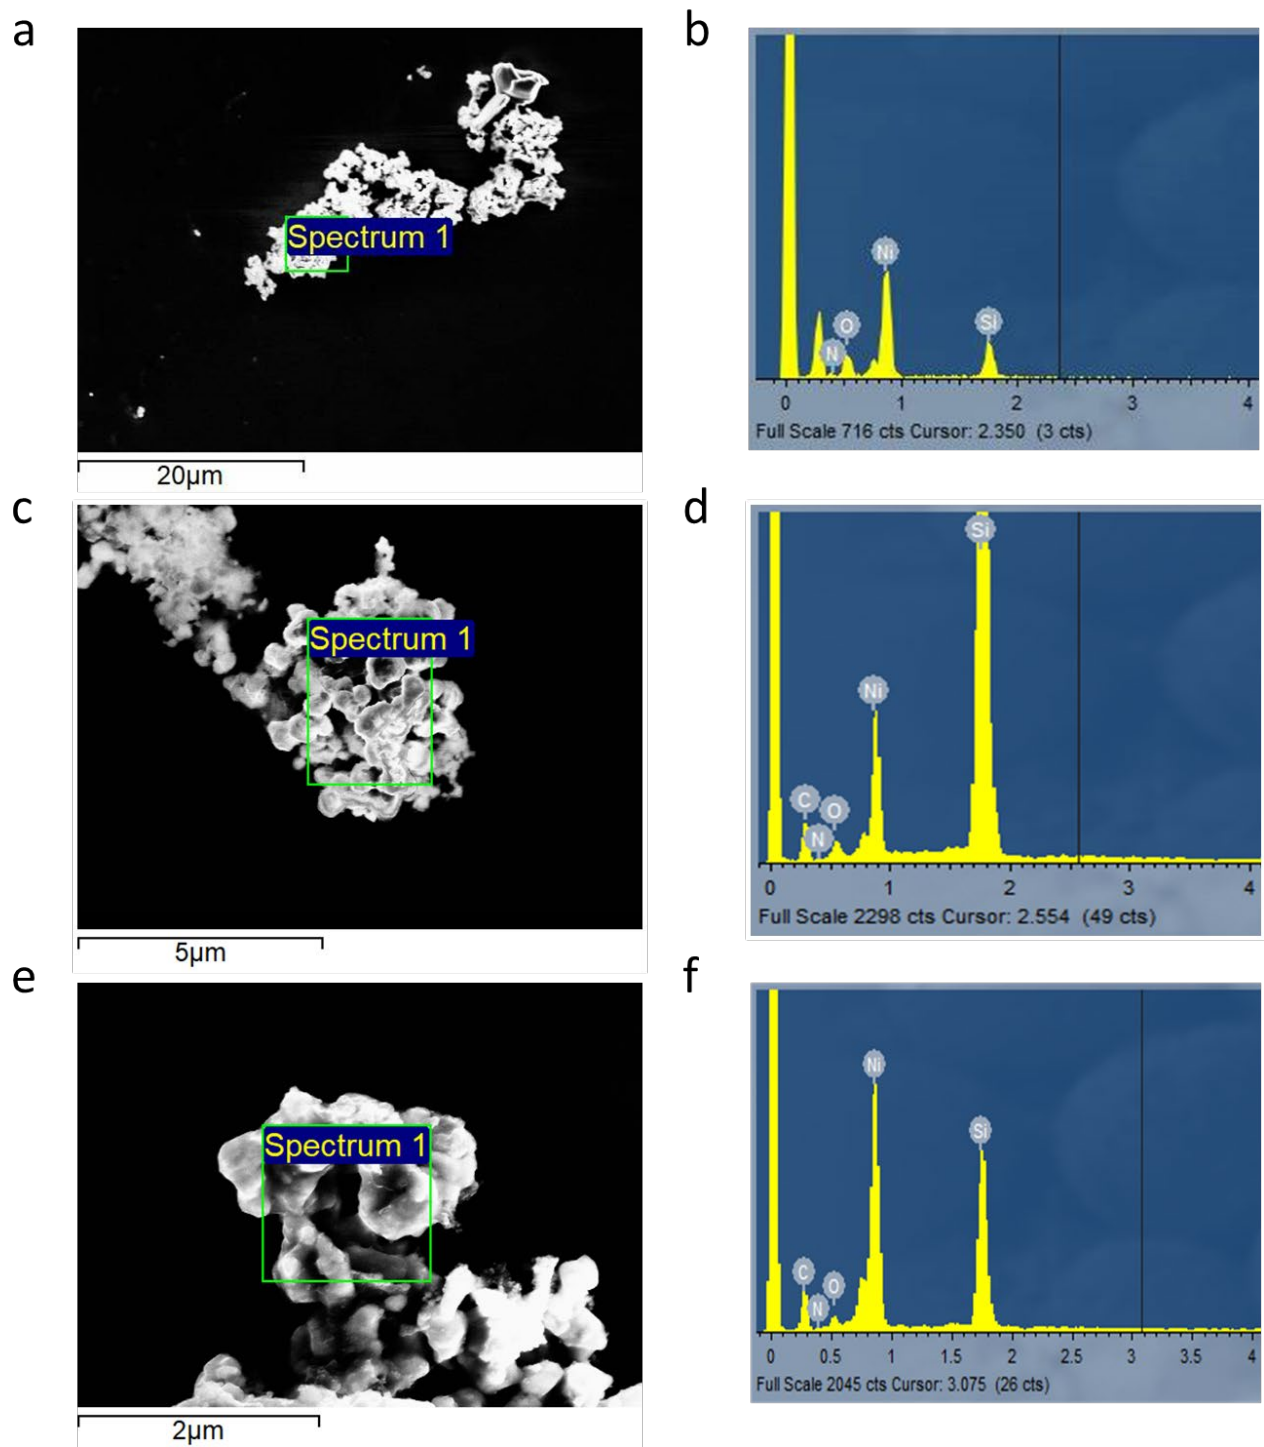

**Figure S22.** SEM images and EDS of  $\text{Ni}_3\text{N}$  nanosheets heated at (a,b) 400 °C, (c,d) 500 °C, and (e,f) 600 °C, for 1 h in argon atmosphere.

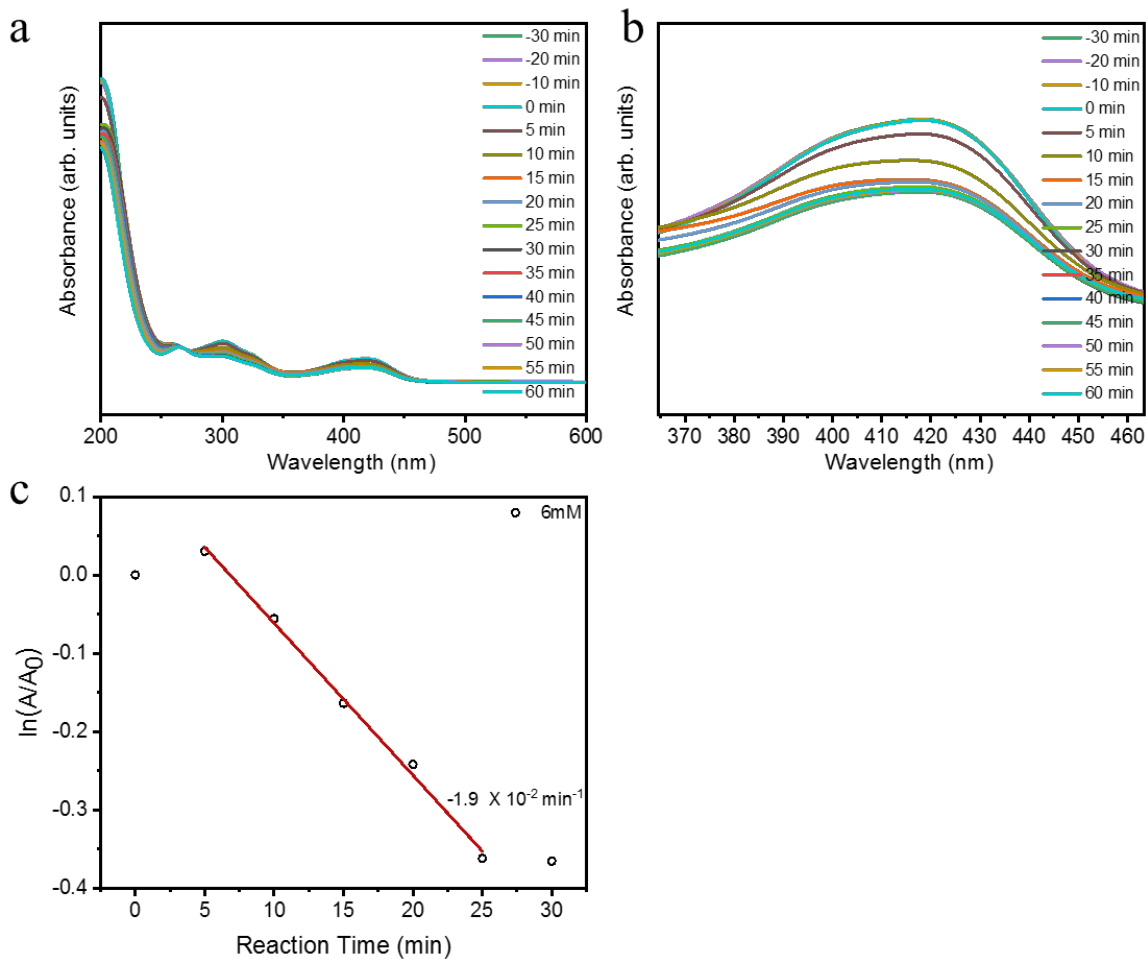

**Figure S23.** (a) UV-Vis spectra showing the conversion of  $\text{Fe}^{3+}$  to  $\text{Fe}^{2+}$  as a function of irradiation time for  $\text{Ni}_3\text{N}$  using  $6 \text{ mM K}_3[\text{Fe}(\text{CN})_6]$ . (b) Magnified UV-Vis spectra around  $419 \text{ nm}$ . (c) Pseudo-first-order plot of  $\ln(A/A_0)$  against reaction time for  $\text{Ni}_3\text{N}$ .

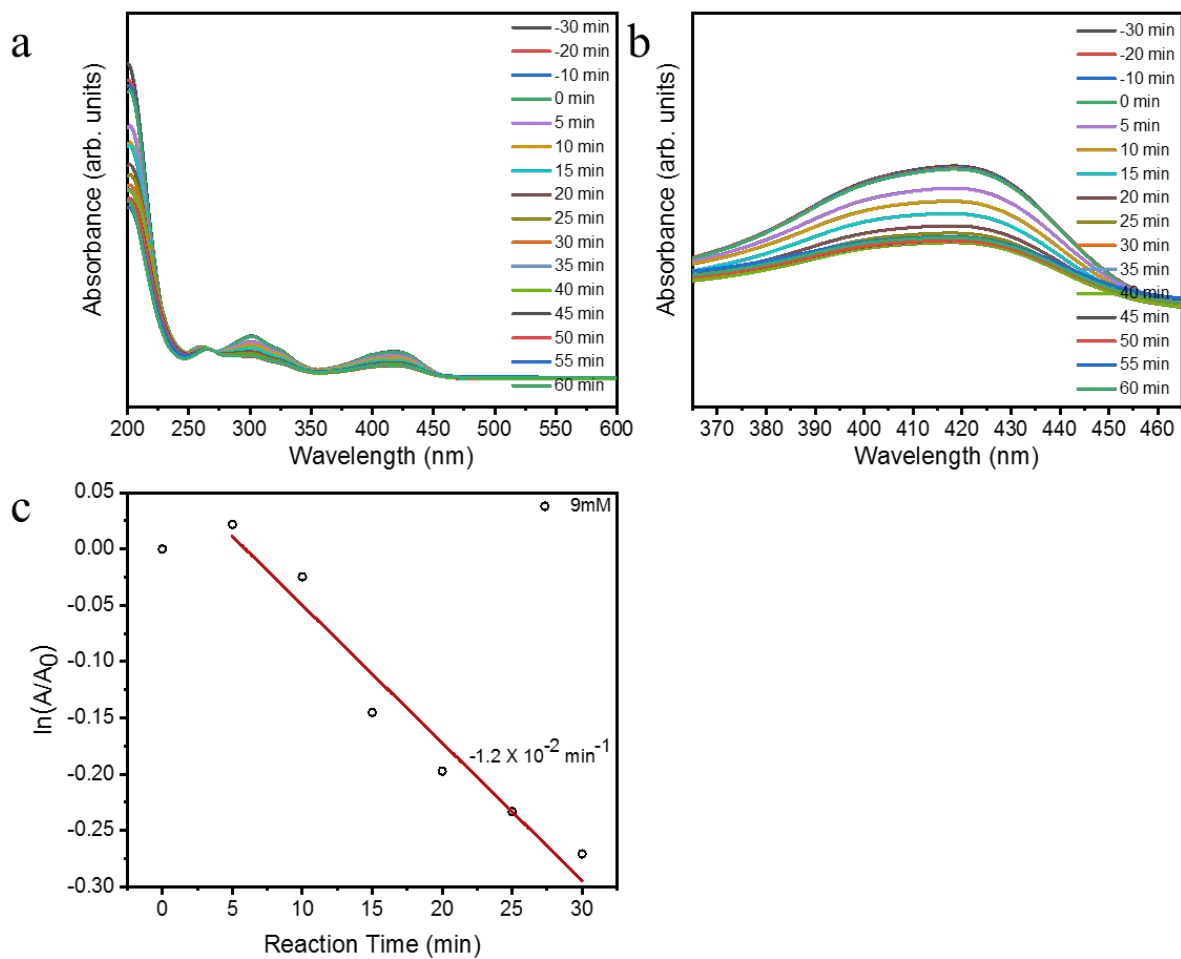

**Figure S24.** (a) UV-Vis spectra showing the conversion of  $\text{Fe}^{3+}$  to  $\text{Fe}^{2+}$  as a function of irradiation time for  $\text{Ni}_3\text{N}$  using  $9 \text{ mM K}_3[\text{Fe}(\text{CN})_6]$ . (b) Magnified UV-Vis spectra around  $419 \text{ nm}$ . (c) Pseudo-first-order plot of  $\ln(A/A_0)$  against reaction time for  $\text{Ni}_3\text{N}$ .

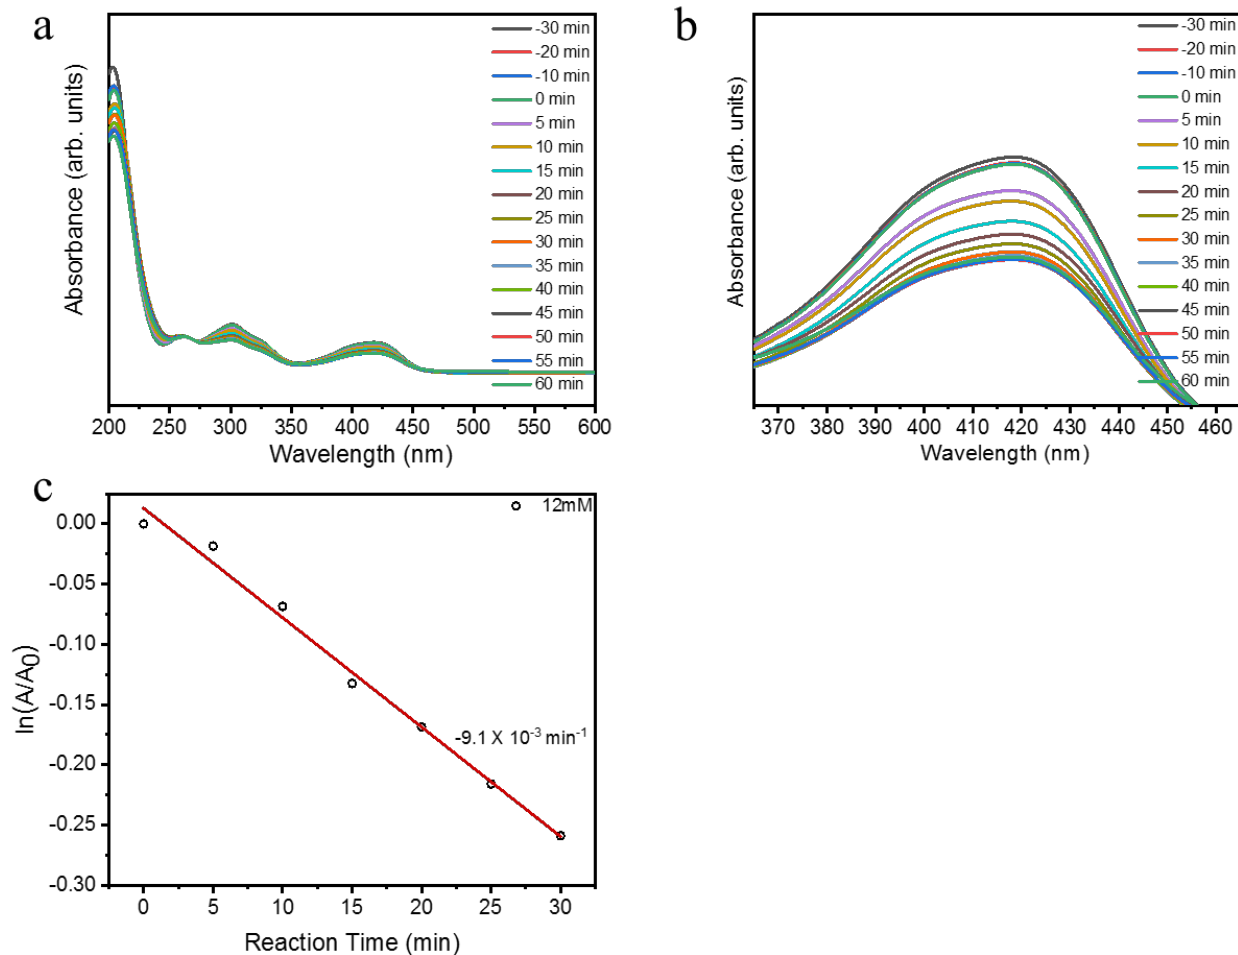

**Figure S25.** (a) UV-Vis spectra showing the conversion of  $\text{Fe}^{3+}$  to  $\text{Fe}^{2+}$  as a function of irradiation time for  $\text{Ni}_3\text{N}$  using  $12 \text{ mM K}_3[\text{Fe}(\text{CN})_6]$ . (b) Magnified UV-Vis spectra around  $419 \text{ nm}$ . (c) Pseudo-first-order plot of  $\ln(A/A_0)$  against reaction time for  $\text{Ni}_3\text{N}$ .

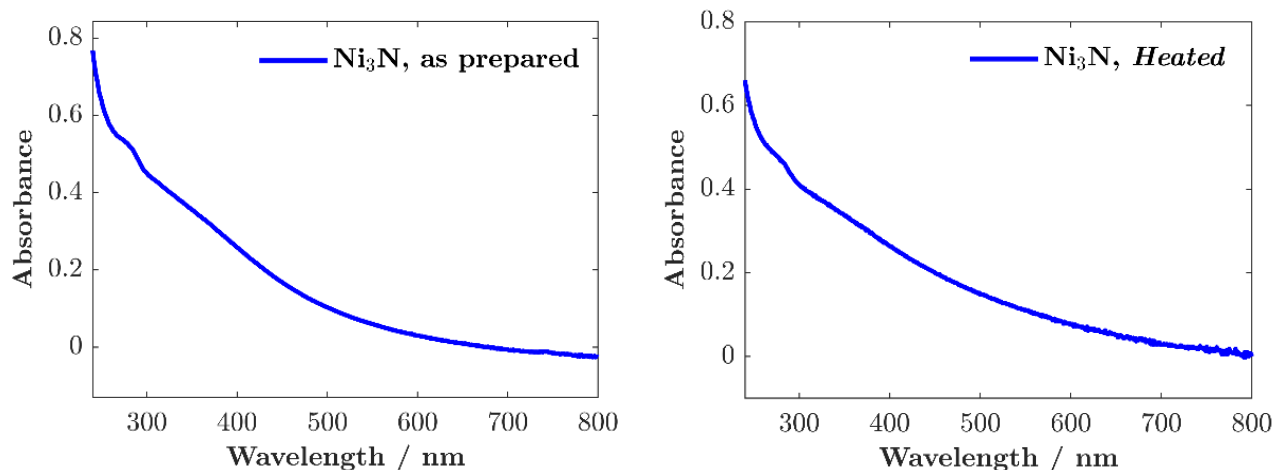

**Figure S26.** Absorption spectra of sonicated Ni<sub>3</sub>N suspensions in ethanol, as-synthesized sample (left) and sample heated at 300 °C (right).

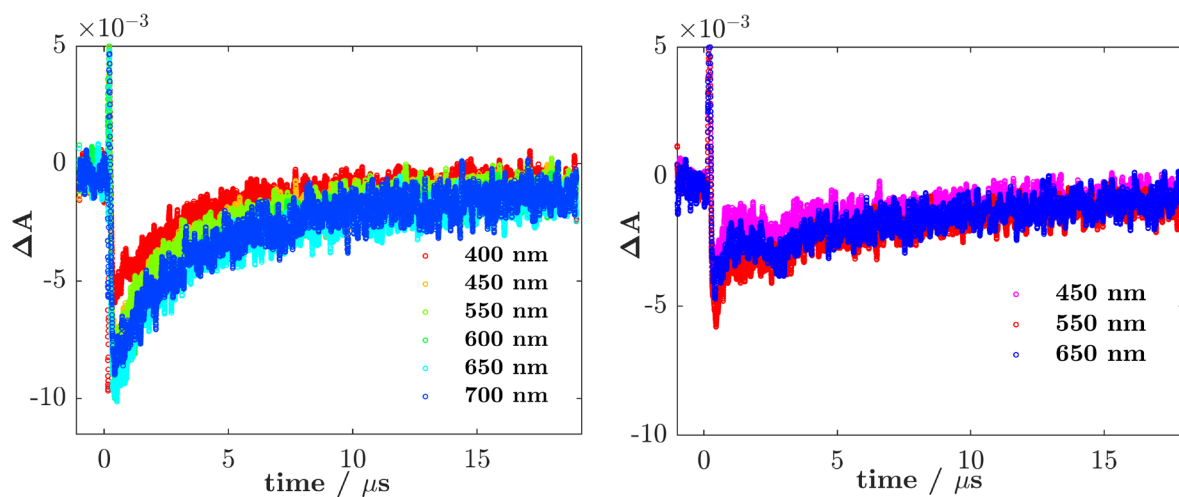

**Figure S27.** *Left:* Kinetic traces monitored at the indicated wavelengths in the legend for the as-synthesized Ni<sub>3</sub>N sample, photoexcited at 500 nm (power=10 mJ/pulse). *Right:* Kinetic traces monitored at the indicated wavelengths in the legend for the as-synthesized Ni<sub>3</sub>N sample saturated with CO<sub>2</sub>, photoexcited at 500 nm (power=10 mJ/pulse). The observed dynamics are the same in both cases.



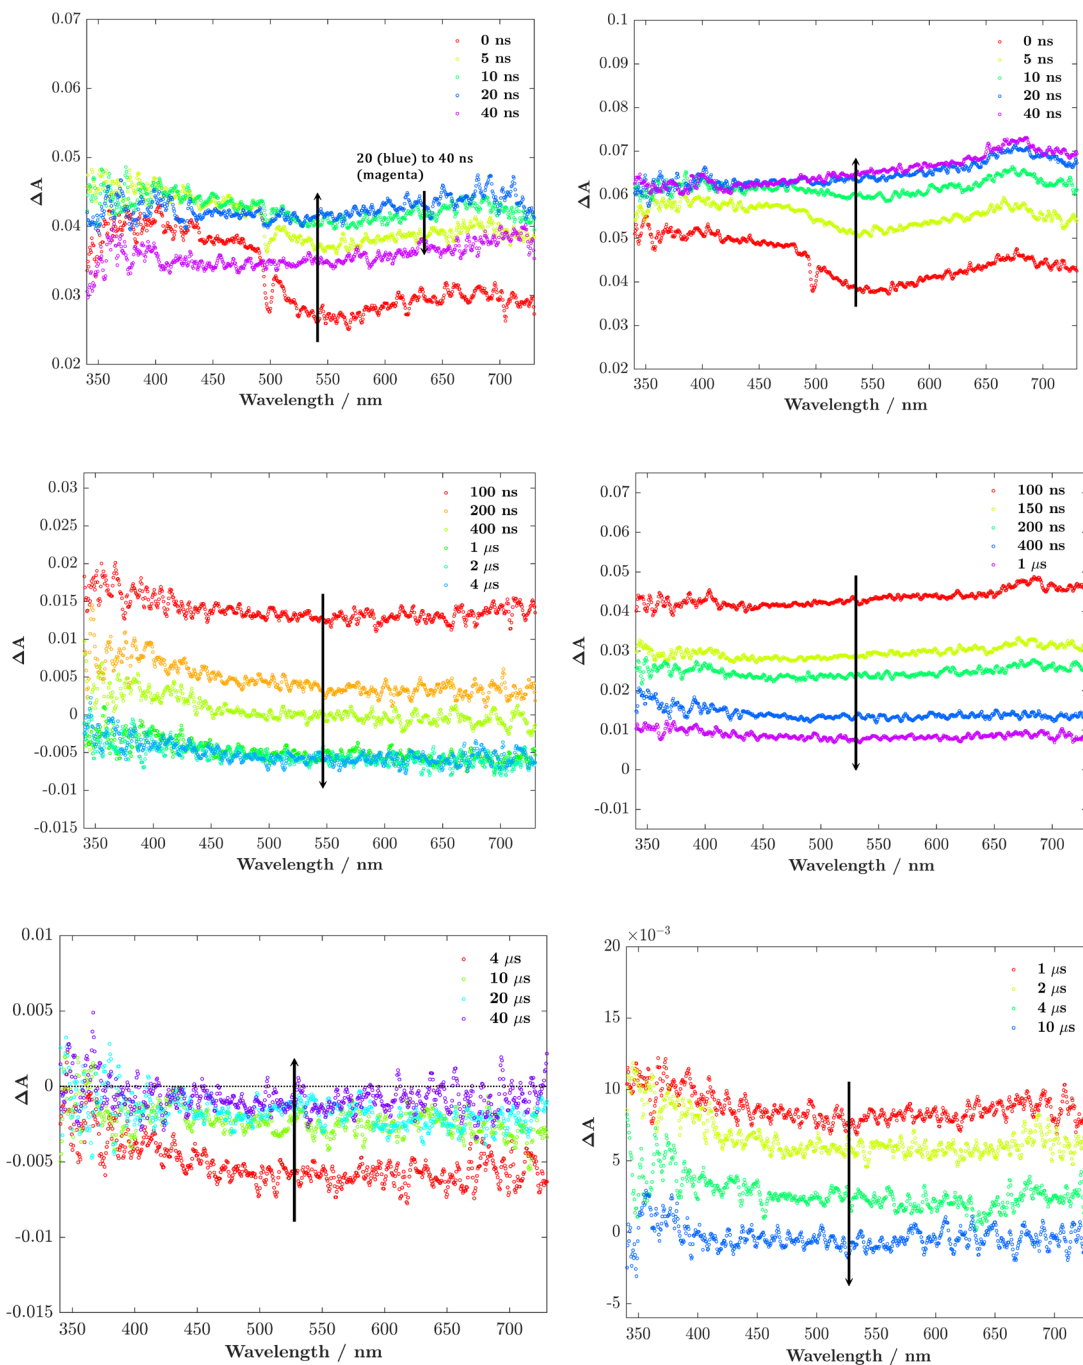

**Figure S28.** *Left column:* Spectra monitored at the indicated times in the legend for the heated  $Ni_3N$  sample, photoexcited at 500 nm (power=10 mJ/pulse). *Right column:* Spectra monitored at the indicated times in the legend for the heated  $Ni_3N$  sample saturated with  $CO_2$ , photoexcited at 500 nm (power=10 mJ/pulse). Note how the latter is characterized by a larger positive offset at the beginning (the first row, left and right).

**Supplementary Note 1.** The calculation of the quantum efficiency of the photocatalytic CO<sub>2</sub> hydrogenation process

Quantum Efficiency is defined as:

$$\text{Quantum Efficiency (\%)} = \frac{\text{Produced CO molecules per unit time}}{\text{Absorbed photon numbers per unit time}} \times 100$$

The no. of absorbed photons per unit time,  $N_{\text{photon}}$  is calculated from the emission spectra of Xe lamp and absorption spectra of Ni<sub>3</sub>N.

$$N_{\text{photon}} = \sum_{\lambda=400 \text{ nm}}^{1100 \text{ nm}} \frac{\text{Light Intensity} \times I\% \times A\% \times \text{Illumination area} \times \text{time}}{\text{Average single photon energy } (E_{\text{photon}}) \times N_A}$$

In photocatalytic CO<sub>2</sub> hydrogenation by Ni<sub>3</sub>N, light intensity was varied on 1 cm<sup>2</sup> area. I% is the percentage of the light intensity of Xe-lamp at a specific wavelength and A% is the absorption percentage of the catalyst at that specific wavelength. Time is 1 h (3600 sec) and  $N_A$  is the Avogadro constant.

The average single photon energy is given by:

$$E_{\text{photon}} = \frac{hc}{\lambda}$$

In this equation, h is the Plank constant  $6.626 \times 10^{-34} \text{ m}^2 \text{ kg s}^{-1}$ , c is the speed of the light in a vacuum ( $3 \times 10^8 \text{ m s}^{-1}$ ), and  $\lambda$  (meter) is the wavelength of the photon.

**Table S1.** Comparison of Photocatalytic CO<sub>2</sub> + H<sub>2</sub> reaction using both Plasmonic and Semiconducting Photocatalysts.

| S. No. | Catalyst                                          | Photocatalytic Conditions                                     | Reactor Type | Temperature | Product Yield (mmol g <sub>cat</sub> <sup>-1</sup> h <sup>-1</sup> ) | Product Selectivity (%) | Ref.      |
|--------|---------------------------------------------------|---------------------------------------------------------------|--------------|-------------|----------------------------------------------------------------------|-------------------------|-----------|
| 1      | Ni <sub>3</sub> N Nanosheets                      | P: 1 atm, L: Xenon lamp, 400-1100 nm, 3.006 W/cm <sup>2</sup> | Flow         | 199 °C      | CO : 1212<br>CH <sub>4</sub> : 0                                     | 99<br>0                 | This work |
| 2      | Ni@p-SiO <sub>2</sub>                             | P: 1 atm, L: Xenon lamp, 2.8 W/cm <sup>2</sup>                | Flow         | 550°C       | CO: 2100<br>CH <sub>4</sub> : 1400                                   | 60<br>40                | 3         |
| 3      | Ni <sub>12</sub> P <sub>5</sub> /SiO <sub>2</sub> | P: 1 atm, L: Xenon lamp, no filter 0.8 W/cm <sup>2</sup>      | Flow         | not given   | CO : 13.5<br>CH <sub>4</sub> : NR                                    | 99.8<br>0.2             | 4         |
| 4      | Nb <sub>2</sub> C/Ni                              | P: 1 atm, L: Xenon lamp, 1.5 W/cm <sup>2</sup>                | Batch        | 300 °C      | CO : 250<br>CH <sub>4</sub> : 1250                                   | 16.6<br>83.4            | 5         |
| 5      | In <sub>2</sub> O <sub>3-x</sub>                  | P: 30 psi, L: Xenon lamp, 2 W/cm <sup>2</sup>                 | Batch        | 300 °C      | CO : 238.8                                                           | 100                     | 6         |
| 6      | Au/TiO <sub>2</sub>                               | P: 3.5 bar, L: Solar simulator, AM 1.5 1.44 W/cm <sup>2</sup> | Batch        | 150°C       | CO : 160<br>CH <sub>4</sub> : 10.5                                   | 93.8<br>6.2             | 7         |
| 7      | Au/TiO <sub>2</sub>                               | P: 110 psi, L: Visible light, 0.5216 W/cm <sup>2</sup>        | Batch        | 400°C       | CO : 159                                                             | 100                     | 8         |
| 8      | Cu <sub>2</sub> O                                 | P: 15 psi, L: Xenon lamp, 4 W/cm <sup>2</sup>                 | Batch        | 322°C       | CO : 70.3                                                            | 100                     | 9         |
| 9      | Fe@C                                              | P: 0.7 atm, L: Xenon lamp                                     | Batch        | 450 °C      | CO : 26.1                                                            | 100                     | 10        |
| 10     | Ni/N-CeO <sub>2</sub>                             | P: 1 atm, L: Xenon lamp                                       | Flow         | 350 °C      | CO : 20.9<br>CH <sub>4</sub> : 0                                     | 100<br>0                | 11        |

|    |                                                            |                                                                     |       |           |                                                                     |              |    |
|----|------------------------------------------------------------|---------------------------------------------------------------------|-------|-----------|---------------------------------------------------------------------|--------------|----|
| 11 | FeO–CeO <sub>2</sub>                                       | P: 1.77 atm, L: Xenon lamp, 2.2 W/cm <sup>2</sup>                   | Flow  | ~ 450 °C  | CO : 20                                                             | 97           | 12 |
| 12 | Rh/Al Nanoantenna                                          | P: 1 atm, L: Solar simulator, 11.3 W/cm <sup>2</sup>                | Batch | 200°C     | CO : 15<br>CH <sub>4</sub> : 550                                    | 3<br>97      | 13 |
| 13 | Au/TiO <sub>2</sub>                                        | P: 1 atm, L: Hg lamp, UV light, 0.150 W/cm <sup>2</sup>             | Flow  | 100°C     | CO : 4.144<br>CH <sub>4</sub> :0.000006                             | ~ 100        | 14 |
| 14 | 2% Ag–0.5% Au/TNWs                                         | P: 0.2 bar, L: Xenon lamp, 0.150 W/cm <sup>2</sup>                  | Batch | not given | CO : 1.813<br>CH <sub>4</sub> : 0.035                               | 97.7<br>1.86 | 15 |
| 15 | Pd@Nb <sub>2</sub> O <sub>5</sub>                          | P: 1 atm, L: Xenon lamp, 2.1 W/cm <sup>2</sup>                      | Flow  | ~ 470 °C  | CO : 1.8                                                            | 100          | 16 |
| 16 | Rh/Al <sub>2</sub> O <sub>3</sub>                          | P: 1 atm, L: UV LED (365 nm), 3 W/cm <sup>2</sup>                   | Flow  | 350°C     | CO : 1.8<br>CH <sub>4</sub> : 21.6                                  | 7.7<br>92.3  | 17 |
| 17 | Ag-NPs/TiO <sub>2</sub> NWs                                | P: 1 atm, L: Hg lamp, visible light, 20 mW/cm <sup>2</sup>          | Flow  | 100°C     | CO : 0.983<br>CH <sub>4</sub> : 0.00973<br>CH <sub>3</sub> OH:0.013 | ~ 98         | 18 |
| 18 | Al@Cu <sub>2</sub> O                                       | P: 1 atm, L: Supercontinuum laser, 400-859 nm, 10 W/cm <sup>2</sup> | Flow  | 160°C     | CO : 0.36                                                           | 100          | 19 |
| 19 | Ni/SiO <sub>2</sub> ·Al <sub>2</sub> O <sub>3</sub>        | P: 1 atm, L: Solar simulator                                        | Batch | 150°C     | CO : 0.392<br>CH <sub>4</sub> : 13.64                               | 2.8<br>97.2  | 20 |
| 20 | In <sub>2</sub> O <sub>3-x</sub> (OH) <sub>y</sub> nanorod | P: 14.1 psi, L: Xenon lamp, 160 mW/cm <sup>2</sup>                  | Flow  | 200°C     | CO : 0.2462                                                         | 100          | 21 |
| 21 | Ni-Au/SiO <sub>2</sub>                                     | P: 1 atm, L: Laser (520 nm), 684 W/cm <sup>2</sup>                  | Flow  | 450°C     | CO : 0.18<br>CH <sub>4</sub> : 0.16                                 | 53<br>47     | 22 |

|    |                                              |                                                     |       |           |                                     |          |    |
|----|----------------------------------------------|-----------------------------------------------------|-------|-----------|-------------------------------------|----------|----|
| 22 | Pt/NaTaO <sub>3</sub>                        | P: 40 kPa, L: Xenon lamp, 2 W/cm <sup>2</sup>       | Batch | not given | CO : 0.134                          | 99       | 23 |
| 23 | Hydride-terminated nano-silicon              | P: 27 psi, L: Xenon lamp, 1.5 W/cm <sup>2</sup>     | Batch | 150 °C    | CO : 0.083<br>CH <sub>4</sub> : 0   | 100<br>0 | 24 |
| 24 | Cu/Pd/HyWO <sub>3-x</sub>                    | P: 1 atm, L: Xenon lamp, 2 W/cm <sup>2</sup>        | Flow  | 250 °C    | CO : 0.041                          | 100      | 25 |
| 25 | Palladium-decorated silicon-hydride          | P: 27 psi, L: Xenon lamp, 1.5 W/cm <sup>2</sup>     | Batch | 170°C     | CO : 0.00001<br>CH <sub>4</sub> : 0 | 0<br>100 | 26 |
| 26 | FL-LDHs/Ru                                   | P: 1 atm, L: Xenon lamp, 1 W/cm <sup>2</sup>        | Flow  | 350 °C    | CO : 0<br>CH <sub>4</sub> : 40      | 0<br>100 | 27 |
| 27 | RuO <sub>2</sub> on silicon photonic crystal | P: 1 atm, L: Xenon lamp, 2.2 W/cm <sup>2</sup>      | Flow  | 150°C     | CO : 0<br>CH <sub>4</sub> : 4       | 0<br>100 | 28 |
| 28 | Ni-BTO                                       | P: 4 atm, L: Xenon lamp, 0.293 W/cm <sup>2</sup>    | Batch | 350 °C    | CO : 0<br>CH <sub>4</sub> : 103.7   | 0<br>100 | 29 |
| 29 | Ru/Silicon Nanowire                          | P: 15 psi, L: Xenon lamp, 1.45 W/cm <sup>2</sup>    | Flow  | 93 °C     | CO : 0<br>CH <sub>4</sub> : 0.74    | 0<br>100 | 30 |
| 30 | Graphene Supp. NiO/Ni                        | P: 1.3 atm, L: Xenon lamp, 0.2236 W/cm <sup>2</sup> | Batch | 200°C     | CO : 0<br>CH <sub>4</sub> : 0.642   | 0<br>100 | 31 |
| 31 | Ni/CeO <sub>2</sub>                          | P: 1 atm, L: Xenon lamp, 0.5 W/cm <sup>2</sup>      | Flow  | 250°C     | CO : 0<br>CH <sub>4</sub> : 2.5     | 0<br>100 | 32 |
| 32 | Ti-IPA MOF                                   | P: 1 atm, L: Xenon lamp, 0.23 W/cm <sup>2</sup> ,   | Batch | 200 °C    | CO : 0<br>CH <sub>4</sub> : 0.033   | 0<br>100 | 33 |

|    |                                                     |                                                              |       |          |                                                                   |          |    |
|----|-----------------------------------------------------|--------------------------------------------------------------|-------|----------|-------------------------------------------------------------------|----------|----|
| 33 | RuO <sub>2</sub> /STO                               | P: 1.3 bar, L: Xenon lamp, 0.108 W/cm <sup>2</sup>           | Batch | 150°C    | CO : 0<br>CH <sub>4</sub> : 14.6                                  | 0<br>100 | 34 |
| 34 | Ag <sub>25</sub> Clusters                           | P: 1 atm, L: Xenon lamp, 420-780,<br>0.183 W/cm <sup>2</sup> | Batch | 100°C    | CO : 0<br>CH <sub>4</sub> : 0.029                                 | 0<br>100 | 35 |
| 35 | Ni/Al <sub>2</sub> O <sub>3</sub> ·SiO <sub>2</sub> | P: 1 atm, L: LED lamp, 2.2 W/cm <sup>2</sup>                 | Batch | 225°C    | CO : 0<br>CH <sub>4</sub> : 35                                    | 0<br>100 | 36 |
| 36 | Rh/TiO <sub>2</sub>                                 | P: 1 atm, L: UV LED (365 nm), 2.73<br>W/cm <sup>2</sup>      | Flow  | 282°C    | CO : 0<br>CH <sub>4</sub> : 0.028                                 | 0<br>100 | 37 |
| 37 | SA Ni/Y <sub>2</sub> O <sub>3</sub>                 | P: 1 atm, L: Xenon lamp, 2 W/cm <sup>2</sup>                 | Flow  | ~ 300 °C | CO : 0<br>CH <sub>4</sub> : 7.5 L m <sup>-2</sup> h <sup>-1</sup> | 0<br>100 | 38 |

\* Pressure (P), Light Source (L), Temperature (T), Reactor (R),. In unit mmol g<sub>cat</sub><sup>-1</sup> h<sup>-1</sup>, cat is active site amount.

## Supplementary References

1. N. Kaul, R. Lomoth. The carbene cannibal: Photoinduced symmetry-breaking charge separation in an Fe(III) *N*-heterocyclic carbene. *J. Am. Chem. Soc.* **143**, 10816–10821 (2021).
2. A. Baiker, M. Maciejewski. Formation and thermal stability of copper and nickel nitrides. *J. Chem. Soc. Faraday Trans. I*, **80**, 2331-2341 (1984).
3. Cai, M.; Wu, Z.; Li, Z.; Wang, L.; Sun, W.; Tountas, A. A.; Li, C.; Wang, S.; Feng, K.; Xu, A. B.; Tang, S.; Tavasoli, A.; Peng, M.; Liu, W.; Helmey, A. S.; He L.; Ozin, G. A.; Zhang X. Greenhouse-inspired supra-photothermal CO<sub>2</sub> catalysis. *Nat. Energy*, **6**, 807-814 (2021).
4. Xu, Y. -F., Duchesne, P. N., Wang, L., Tavasoli, A., Jelle, A. A., Xia, M., Liao, J. -F., Kuang, D. -B., Ozin, G. A. High-performance light-driven heterogeneous CO<sub>2</sub> catalysis with near-unity selectivity on metal phosphides. *Nat. Commun.* **11**, 5149 (2020).
5. Wu, Z., Li, C., Li, Z., Feng, K., Cai, M., Zhang, D., Wang, S., Chu, M., Zhang, C., Shen, J., Huang, Z., Xiao, Y., Ozin, G. A., Zhang, X., He, L. Niobium and titanium carbides (mxenes) as superior photothermal supports for CO<sub>2</sub> photocatalysis. *ACS Nano* **15**, 5696–5705 (2021).
6. Wang, L. et al. Black indium oxide a photothermal CO<sub>2</sub> hydrogenation catalyst. *Nat. Commun.* **11**, 2432 (2020)
7. Molina, P. M., Meulendijks, N., Xu, M., Verheijen, M. A., den Hartog, T., Buskens, P., Sastre, F. Low temperature sunlight-powered reduction of CO<sub>2</sub> to CO using a plasmonic Au/TiO<sub>2</sub> nanocatalyst. *ChemCatChem* **13**, 4507–4513 (2021).
8. Upadhye, A. A., Insoo Roa, Zenga, X., Kim, H. J., Tejedor, I., Anderson, M. A., Dumesic J. A., Hub, G. W. Plasmon-enhanced reverse water gas shift reaction over oxide supported Au catalysts. *Catal. Sci. Technol.*, **5**, 2590-2601 (2015).
9. Wan, L. L. et al. Cu<sub>2</sub>O nanocubes with mixed oxidation-state facets for (photo)catalytic hydrogenation of carbon dioxide. *Nat. Catal.* **2**, 889-898 (2019).
10. Zhang, H. et al. Surface-Plasmon-Enhanced Photodriven CO<sub>2</sub> Reduction Catalyzed by Metal-Organic-Framework-Derived Iron Nanoparticles Encapsulated by Ultrathin Carbon Layers. *Adv. Mater.* **28**, 3703-3710 (2016).
11. Jia, Z., Ning, S., Tong, Y., Chen, X., Hu, H., Liu, L., Ye, J., Wang, D. Selective photothermal reduction of CO<sub>2</sub> to CO over Ni-nanoparticle/N-doped CeO<sub>2</sub> nanocomposite catalysts. *ACS Appl. Nano Mater.* **4**, 10485–10494 (2021).
12. Zhao, J. et al. FeO–CeO<sub>2</sub> nanocomposites: an efficient and highly selective catalyst system for photothermal CO<sub>2</sub> reduction to CO. *NPG Asia Mater.* **12**, 5 (2020).
13. Fu, G., Jiang, M., Liu, J., Zhang, K., Hu, Y., Xiong, Y., Tao, A., Tie, Z., Jin, Z. Rh/Al Nanoantenna photothermal catalyst for wide-spectrum solar-driven CO<sub>2</sub> methanation with nearly 100% selectivity. *Nano Lett.* **21**, 8824–8830 (2021).
14. Tahir, B., Tahir, M., Amin, N. A. S. Photocatalytic CO<sub>2</sub> conversion over Au/TiO<sub>2</sub> nanostructures for dynamic production of clean fuels in a monolith photoreactor. *Clean Techn. Environ. Policy*, doi 10.1007/s10098-016-1181-4 (2016).
15. Tahir, M., Tahir, B., Amin, N. A. S. Synergistic effect in plasmonic Au/Ag alloy NPs co-coated TiO<sub>2</sub> NWs toward visible-light enhanced CO<sub>2</sub> photoreduction to fuels. *Appl. Catal. B: Environ.* **204**, 548–560 (2017).
16. Jia, J. et al. Photothermal catalyst engineering: hydrogenation of gaseous CO<sub>2</sub> with high activity and tailored selectivity. *Adv. Sci.* **4**, 1700252 (2017).
17. Zhang, X.; Li, X.; Zhang, D.; Su, Q. N.; Yang, W.; Everitt, O. H.; Liu, J. Product selectivity in plasmonic photocatalysis for carbon dioxide hydrogenation. *Nat Commun*, **8**, 14542 (2017).
18. Tahir, M., Tahir, B., Amin, N. A. S., Zakaria, Z. Y. Photo-induced reduction of CO<sub>2</sub> to CO with hydrogen over plasmonic Ag-NPs/TiO<sub>2</sub> NWs core/shell hetero-junction under UV and visible light. *J. CO<sub>2</sub> Util.* **18**, 250–260 (2017).
19. Robotjazi, H., Zhao, H., Swearer, D. F., Hogan, N. J., Zhou, L., Alabastri, A., McClain, M. J., Nordlander, P., Halas, N. J. Plasmon-induced selective carbon dioxide conversion on earth-abundant aluminum-cuprous oxide antenna-reactor nanoparticles. *Nat Commun*, **8**, 27 (2017).
20. Sastre, F., Puga, A. V., Liu, L., Corma, A., García, H. Complete photocatalytic reduction of CO<sub>2</sub> to methane by H<sub>2</sub> under solar light irradiation. *J. Am. Chem. Soc.* **136**, 6798–6801 (2014).
21. Loh, J. Y. Y., Mohan, A., Flood, A. G., Ozin, G. A., Kherani, N. P. Waveguide photoreactor enhances solar fuels photon utilization towards maximal optoelectronic – photocatalytic synergy. *Nat Commun*, **12**, 402 (2021).

22. J. N. G., García-García, I., Perfrement, T., Lovell, E. C., Schmidt, T. W., Scott, J., Amal, R. Plasmonic effects on CO<sub>2</sub> reduction over bimetallic Ni-Au catalysts. *Stanley. Chem. Eng. Sci.* **194**, 94-104 (2019).
23. Li, M. et al. Highly efficient and stable photocatalytic reduction of CO<sub>2</sub> to CH<sub>4</sub> over Ru loaded NaTaO<sub>3</sub>. *Chem. Commun.* **51**, 7645-7648 (2015).
24. Sun, W., Qian, C., He, L., Ghuman, K. K., Wong, A.P.Y., Jia, J., Jelle, A. A., O'Brien, P. G., Reyes, L. M., Wood, T. E., Helmy, A. S., Mims, C. A., Chandra Veer Singh, C. V., Ozin, G. A. Heterogeneous reduction of carbon dioxide by hydride-terminated silicon nanocrystals. *Nat. Commun.* **7**, 12553 (2016).
25. Li, Y. F. et al. Cu atoms on nanowire Pd/HyWO<sub>3-x</sub> bronzes enhance the solar reverse water gas shift reaction. *J. Am. Chem. Soc.* **141**, 14991-14996 (2019).
26. Qian, C., Sun, W., Hung, D. L.H., Qiu, C., Makaremi, M., Kumar, S. G. H., Wan, L., Ghoussoub, M., Wood, T. E., Xia, M., Tountas, A. A., Li, Y. F., Wang, L., Dong, Y., Gourevich, I., Singh, C. V., Ozin, G. A. Catalytic CO<sub>2</sub> reduction by palladium-decorated silicon-hydride nanosheets. *Nat. Catal.* **2**, 46-54 (2019).
27. Ren, J., Ouyang, S., Xu, H., Meng, X., Wang, T., Wang, D., Jinhua Ye, J. Targeting activation of CO<sub>2</sub> and H<sub>2</sub> over Ru-loaded ultrathin layered double hydroxides to achieve efficient photothermal CO<sub>2</sub> methanation in flow-type system. *Adv. Energy Mater.* **7**, 1601657 (2017).
28. Jelle, A. A., Ghuman, K. K., O'Brien, P. G., Hmadeh, M., Sandhel, A., Perovic, D. D., Singh, C. V., Mims, C. A., Ozin, G. A. Highly efficient ambient temperature CO<sub>2</sub> photomethanation catalyzed by nanostructured RuO<sub>2</sub> on silicon photonic crystal support. *Adv. Energy Mater.* **8**, 1702277 (2018).
29. Mateo, D., Morlanes, N., Maity, P., Shterk, G., Mohammed, O. F., Jorge Gascon, J., Efficient visible-light driven photothermal conversion of CO<sub>2</sub> to methane by nickel nanoparticles supported on barium titanate. *Adv. Funct. Mater.* **31**, 2008244 (2021).
30. O'Brien, P. G., Sandhel, A., Wood, T. E., Jelle, A. A., Hoch, L. B., Perovic, D. D., Mims, C. A., Ozin, G. A. Photomethanation of gaseous CO<sub>2</sub> over Ru/silicon nanowire catalysts with visible and near-infrared photons. *Adv. Sci.* **1**, 1400001 (2014).
31. Mateo, D., Albero, J., García, H. Graphene supported NiO/Ni nanoparticles as efficient photocatalyst for gas phase CO<sub>2</sub> reduction with hydrogen. *Appl. Catal. B: Environ.* **224**, 563-571 (2018).
32. Golovanova, V., Spadaro, M. C., Arbiol, J., Golovanov, V., Rantala, T. T., Andreu, T., Morante, J. R. Effects of solar irradiation on thermally driven CO<sub>2</sub> methanation using Ni/CeO<sub>2</sub>-based catalyst. *Appl. Catal. B: Environ.* **291** 120038 (2021).
33. Wang, S., Cabrero-Antonino, M., Navalón, S., Cao, C. -C., Tissot, A., Dovgaliuk, I., Marrot, J., Martineau-Corcós, C., Yu, L., Wang, H., Shepard, W., Garcia, H., Serre, C. A robust titanium isophthalate metal-organic framework for visible-light photocatalytic CO<sub>2</sub> methanation. *Chem* **6**, 3409-3427 (2020).
34. Mateo, D., Albero, J., Garcia, H. Titanium-perovskite-supported RuO<sub>2</sub> nanoparticles for photocatalytic CO<sub>2</sub> methanation. *Joule* **3**, 1949-1962 (2019)
35. Xiong, Y., Chen, H., Hu, Y., Yang, S., Xue, X., He, L., Liu, X., Ma, J., Jin, Z. photodriven catalytic hydrogenation of CO<sub>2</sub> to CH<sub>4</sub> with nearly 100% selectivity over Ag<sub>25</sub> clusters. *Nano Lett.* **21**, 8693-8700 (2021).
36. Bueno-Alejo, C. J., Arca-Ramos, A., Hueso, J. L. Santamaria, J. LED-driven continuous flow carbon dioxide hydrogenation on a nickel-based catalyst. *Catal. Today* **355**, 678-684 (2020).
37. Li, X.; Everitt, O. H.; Liu, J. Confirming nonthermal plasmonic effects enhance CO<sub>2</sub> methanation on Rh/TiO<sub>2</sub> catalysts. *Nano Res.* **2019**, 12, 1906-1911.
38. Li, Y. et al. Selective light absorber-assisted single nickel atom catalysts for ambient sunlight-driven CO<sub>2</sub> methanation. *Nat. Commun.* **10**, 2359 (2019).
