# Supplementary material for: Surface plasmon-enhanced photo-driven CO2 hydrogenation by hydroxy-terminated nickel nitride nanosheets
Source: PubMed Central journal article supplement (PMC10156734; doi:10.1038/s41467-023-38235-9), 2023-05-03
Supplement: 41467_2023_38235_MOESM2_ESM.pdf [file 41467_2023_38235_MOESM2_ESM.pdf]

## **Description of Additional Supplementary Files**

File Name: Supplementary Data 1

Description: Detailed calculations of CO productivity

File Name: Supplementary Data 2

Description: Detailed calculations of quantum efficiency as a function of intensity at various reaction temperatures.
